# 1 Me31B, A Key Repressor in Germline Regulation 2 and Beyond 3

4 Ming Gao

5 Biology Department, Indiana University Northwest, Gary, IN, USA  
6

## 7 Abstract

8 Me31B, an evolutionarily conserved ATP-dependent RNA helicase, plays an  
9 important role in the development of the germline across diverse animal species. Its  
10 cellular functionality has been posited as a translational repressor, participating in  
11 various RNA metabolism pathways to intricately regulate the spatiotemporal expression  
12 of RNAs. Despite its evident significance, the precise role and mechanistic  
13 underpinnings of Me31B remain insufficiently understood. This article endeavors to  
14 comprehensively review historic and recent research on Me31B, distill the major  
15 findings, discern generalizable patterns in Me31B's functions across different research  
16 contexts, and provide insights into its fundamental role and mechanism of action. The  
17 primary focus of this article centers on elucidating the role of *Drosophila* Me31B within  
18 the germline, while concurrently delving into pertinent research on its orthologs within  
19 other species and cellular systems.  
20

## 21 **1. *Drosophila* Germline and Maternal Effect Gene *me31B***

22 *Drosophila melanogaster* germline is a useful model for exploring the genetic  
23 factors involved in animal germline development (1-7). Within the female germline, the  
24 ovaries consist of a series of tubular structures named ovarioles, each of which houses  
25 a chain of developing egg chambers at various stages of oogenesis (which range from 1  
26 to 14, Figure 1). This process begins with the division of germline stem cells in the  
27 germarium at the tip of each ovariole, resulting in interconnected cyst cells. Each cyst  
28 includes 15 nurse cells and one oocyte, surrounded by a layer of somatic follicle cells,  
29 forming an egg chamber. Within each egg chamber, the nurse cells synthesize nutrient  
30 molecules - including maternally expressed RNAs and proteins - and deposit them into  
31 the developing egg, supporting growth and maturation. These maternal RNAs and  
32 proteins form a complex gene-expression-regulation program, guiding the germline  
33 through oogenesis, embryogenesis, and eventual development into the next generation  
34 (4, 8-14). The protein **Maternally Expressed at 31B** (Me31B) is a crucial component  
35 among the maternal gene products for the development of germline (15). Its orthologs in  
36 other animals also appear to possess this same significance (16-18).

## 37 38 **2. Historic Background of *me31B* Gene**

39 The discovery of the second maternally expressed *Drosophila* gene, *me31B*, was  
40 made by De Valoir et al. (19). Similar to the first maternal gene *vas* (encodes another  
41 RNA helicase Vas), *me31B* transcripts are predominantly found in *Drosophila* female  
42 germline cells: nurse cells, oocytes, and early embryos. As a result, *me31B* was named  
43 after this maternal expression pattern and its genomic location at the 31B region of the

44 2<sup>nd</sup> chromosome (19). In the early study, *me31B* expression was only detected in the  
45 female germline due to the limited detection sensitivity. However, recent studies have  
46 discovered *me31B*'s expression and roles in the male germline and various somatic  
47 tissues.

48

### 49 **3. The Me31B Helicase Family and Me31B's Domain/Motifs**

50 Me31B belongs to the DEAD-box RNA helicase family, a large group of proteins  
51 that use the energy from ATP hydrolysis to unwind RNAs during various RNA  
52 metabolism processes (20-27). This is indicated by the presence of the signature Asp-  
53 Glu-Ala-Asp (DEAD) sequence and other structural features (19). Me31B and its  
54 orthologs are classified under the evolutionarily conserved subfamily of Me31B/DDX6-  
55 like, ATP-dependent, DEAD-box, RNA helicases. This subfamily includes various  
56 members, including human DDX6/RCK, mouse p54, frog Xp54, worm CGH-1, yeast  
57 Dhh1p, and others, with a sequence similarity of 60% to 80% between each other (15,  
58 18, 28). For simplicity, we commonly use the term Me31B as a generic reference to the  
59 aforementioned proteins, unless there is a need to specify.

60 The protein Me31B contains several conserved domains, motifs, and amino  
61 acids important for its functions. Table 1 summarizes these functional domains and  
62 motifs' locations, known/hypothetical functions, and level of conservation. Me31B  
63 domains and motifs have been categorized into six groups based on functions and  
64 sequence characteristics. Group One consists of two large RecA-like domains (N-  
65 terminal RecA-like and C-terminal RecA-like domains) that potentially cooperate to  
66 unwind RNAs, along with four motifs (DVLARAK, DEAD-box, SAT, and HRIGR motifs)

67 that are critical for ATPase/helicase activities. Group Two contains 11 highly conserved  
68 motifs (Q, I, Ia, GG, Ib, II, III, IV, QxxR, V, and VI motifs) with poorly understood  
69 functions. Group Three contains four amino acids (H333, R334, C351, and S352) that  
70 are crucial for human development as deduced from human ortholog DDX6. Group Four  
71 has two intrinsically disordered regions (IDRs) that could affect Me31B protein self-  
72 aggregation. Group Five includes two hypothetical nuclear localization and export signal  
73 sequences (NLS and NES, both deduced from homologous sequences of DDX6).  
74 Group Six contains 16 additional motifs that facilitate Me31B's interaction with other  
75 proteins. The above domains and motifs are believed to play important roles in Me31B  
76 functions for regulating germline RNA stability, localization, and translation, which, in  
77 turn, contributes to proper germline development.

**Table 1. *Drosophila* Me31B Domains and Motifs**

| Me31B Domains and Motifs                                                                                                     | Extent of Conservation*                                | Known or Hypothetical Functions                                                                                                       | Reference    |
|------------------------------------------------------------------------------------------------------------------------------|--------------------------------------------------------|---------------------------------------------------------------------------------------------------------------------------------------|--------------|
| <b>Group One: Large functional domains and motifs participating in ATPase and RNA helicase activity</b>                      |                                                        |                                                                                                                                       |              |
| <b>N-terminal domain</b> (1 – 267)                                                                                           | Conserved RecA-like domain in humans and other species | N-terminal RecA-like domain; ATP binding; Helicase activity; P-body assembly; Female fertility                                        | (18, 29, 30) |
| <b>C-terminal domain</b> (268 – 459)                                                                                         | Conserved RecA-like domain in humans and other species | C-terminal RecA-like domain; RNA translational repression; Protein binding; P-body assembly; Female fertility                         | (29-31)      |
| <b>DEAD box</b> (207 – 210, within II motif)                                                                                 | 100% in humans and other species                       | ATP-binding, RNA binding, RNA translational control, protein binding; Female fertility                                                | (28-30, 32)  |
| <b>SAT</b> (238 – 240, same as III motif)                                                                                    | 100% in humans and other species                       | Helicase activity                                                                                                                     | (18, 29)     |
| <b>HRIGR</b> (381 – 385, within VI motif)                                                                                    | 100% in humans and other species                       | ATP binding, RNA binding, helicase activity, RNA translational repression, p-body accumulation, and P-body assembly; Female fertility | (28-30)      |
| <b>DVLARAK</b> (97 – 103, partial overlap with I motif)                                                                      | 93% of human and other species                         | RNA binding, translational control, P-body assembly; Female fertility                                                                 | (29, 30)     |
| <b>Group Two: Motifs highly conserved in the Me31B/DDX6 family in humans and other species with mostly unknown functions</b> |                                                        |                                                                                                                                       |              |
| <b>Q</b> (77 – 85)                                                                                                           | 94% in humans and 89% - 94% in other species           | Unknown                                                                                                                               | (18)         |
| <b>I</b> (102 – 109)                                                                                                         | 94% in humans and 94% - 100% in other species          | Unknown                                                                                                                               | (18)         |
| <b>I<sub>a</sub></b> (134 – 141)                                                                                             | 100% in humans and other species                       | Unknown                                                                                                                               | (18)         |
| <b>GG</b> (162 – 163)                                                                                                        | 100% in humans and other species                       | Unknown                                                                                                                               | (33)         |
| <b>I<sub>b</sub></b> (180 – 186)                                                                                             | 94% in humans and 94% - 100% other species             | Unknown                                                                                                                               | (18)         |

|                                                                                                                                |                                                   |                                                                                           |              |
|--------------------------------------------------------------------------------------------------------------------------------|---------------------------------------------------|-------------------------------------------------------------------------------------------|--------------|
| II (204 – 210, contains DEAD box)                                                                                              | 94% in humans and 94% - 100% in other species     | Containing the DEAD box                                                                   | (18)         |
| III (238 – 240, same as SAT motif)                                                                                             | 100% in humans and other species                  | Helicase activity                                                                         | (18, 29)     |
| IV (299 – 301)                                                                                                                 | 100% in humans and other species                  | Unknown                                                                                   | (18)         |
| <b>QxxR</b> (331 – 334)                                                                                                        | 100% in humans and other species (for Q and R)    | Unknown                                                                                   | (16)         |
| V (356 – 360)                                                                                                                  | 100% in humans and other species                  | Unknown                                                                                   | (18)         |
| VI (380 – 390, contains HRIGR motif)                                                                                           | 100% in humans and 95% - 100% in other species    | Unknown                                                                                   | (18)         |
| <b>Group Three: Motifs conserved in humans and their mutations result in human developmental defects</b>                       |                                                   |                                                                                           |              |
| <b>H333</b> (within QxxR motif)                                                                                                | 100% in humans and other species                  | The mutation causes cognitive and developmental delays and defects (in DDX6)              | (16)         |
| <b>R334</b> (within QxxR motif)                                                                                                | 100% in humans and other species                  | The mutation causes cognitive and developmental delays and defects (in DDX6)              | (16)         |
| <b>C351</b>                                                                                                                    | 100% in humans and other species                  | Mutation causes cognitive and developmental delays and defects (in DDX6)                  | (16)         |
| <b>S352</b>                                                                                                                    | 50% in humans and 50% - 100% in other species     | Mutation causes cognitive and developmental delays and defects (in DDX6)                  | (16)         |
| <b>Group Four: Intrinsically disordered regions (IDR)</b>                                                                      |                                                   |                                                                                           |              |
| <b>N-terminal IDR</b> (1 – 53)                                                                                                 | Presence, length, and sequence vary among species | Protein aggregation regulation                                                            | (34)         |
| <b>C-terminal IDR</b> (431 – 459)                                                                                              |                                                   |                                                                                           |              |
| <b>Group Five: Hypothetical signal peptides involved in nuclear import/export</b>                                              |                                                   |                                                                                           |              |
| <b>Nuclear localization signal</b> (NLS, 35 – 48, hypothetical)                                                                | Presence, length, and sequence vary among species | Nuclear localization signal (in DDX6)                                                     | (35)         |
| <b>Nuclear export signal</b> (NES, 113 – 122, hypothetical)                                                                    |                                                   | Nuclear export signal (in DDX6)                                                           |              |
| <b>Group Six: Other protein- and RNA-binding motifs</b>                                                                        |                                                   |                                                                                           |              |
| <b>FDf motif-binding</b> (285 – 289, part of EDC3 and Tral binding region motif and other motifs)                              | 100% in humans and other species                  | FDf-domain binding motif; Aggregation status                                              | (30, 36)     |
| <b>W pocket</b> (310 – 314)                                                                                                    | 100% in humans and other species                  | 4E-T, EDC3, and LSM14A binding site (in DDX6)                                             | (36)         |
| <b>Protein binding patch 1</b> (281 – 294, partially overlap with EDC3 and Tral binding region motif and other motifs)         | 100% in humans and 94% - 100% in other species    | Potential FDf-binding site for binding Pat1 and EDC3 (in DDX6)                            | (35, 37)     |
| <b>Protein binding patch 2</b> (405 – 412, partially overlaps with Y401-L407 motif)                                            | 63% in humans and 50% - 63% in other species      | Interaction with EDC3 (in DDX6)                                                           | (33, 35)     |
| <b>Protein binding patch 3</b> (304 – 307)                                                                                     | 75% in humans and 50% - 75% in other species      | 4E-T and PATL1 binding site (in DDX6)                                                     | (35)         |
| <b>NOT1 Binding Specificity motif</b> (290 – 296, partially overlaps with EDC3 and Tral binding region motif and other motifs) | 93% in humans and 86% - 93% in other species      | Provides binding specificity to NOT1; RNA translational repression (in DDX6)              | (38)         |
| <b>EDC3 and Tral binding motif</b> (274 – 292, partially overlaps with Protein binding patch 1 and other motifs)               | 95% in humans and 92% - 95% in other species      | EDC3/Tral binding; Localization to P-body; RNA translational repression                   | (29, 33)     |
| <b>F63 – L70</b>                                                                                                               | 87% in humans and 81% to 87% in other species     | Interaction with eIF4E-3 isoform                                                          | (39)         |
| <b>R347</b>                                                                                                                    | 100% in humans and other species                  | Needed for binding to CNOT1 (in DDX6)                                                     | (35, 37, 38) |
| <b>R80</b>                                                                                                                     | 50% in humans and 0% - 50% in other species       | Potential symmetrically demethylated arginine (SDMA) interacting with Tud-domain proteins | (40)         |

|                                                                                                                                                                                                                                                                                                                                                                                                                                                                                                                            |                                              |                                                             |      |
|----------------------------------------------------------------------------------------------------------------------------------------------------------------------------------------------------------------------------------------------------------------------------------------------------------------------------------------------------------------------------------------------------------------------------------------------------------------------------------------------------------------------------|----------------------------------------------|-------------------------------------------------------------|------|
| <b>R156</b>                                                                                                                                                                                                                                                                                                                                                                                                                                                                                                                | 50% in humans and other species              | Potential SDMA interacting with Tud-domain proteins         | (40) |
| <b>R254</b>                                                                                                                                                                                                                                                                                                                                                                                                                                                                                                                | 0% in humans and 0% - 100% in other species  | Potential SDMA interacting with Tud-domain proteins         | (40) |
| <b>RG (R357 and G358)</b>                                                                                                                                                                                                                                                                                                                                                                                                                                                                                                  | 100% in humans and other species             | Involved in de-capping (in Dhh1p)                           | (41) |
| <b>K108</b>                                                                                                                                                                                                                                                                                                                                                                                                                                                                                                                | 100% in humans and other species             | ATP-binding and RNA translational control (in Bel helicase) | (42) |
| <b>Y273</b>                                                                                                                                                                                                                                                                                                                                                                                                                                                                                                                | 100% in humans and other species             | Potential Phosphorylation site; function unknown (in DDX6)  | (35) |
| <b>Y401-L407</b> (partially overlaps with Protein binding patch 2 motif)                                                                                                                                                                                                                                                                                                                                                                                                                                                   | 79% in humans and 71% - 79% in other species | Interaction with eIF4E-1                                    | (39) |
| <p>* Extent of Conservation is calculated with 6 species: <i>C. elegans</i>, planarian, <i>Drosophila</i>, <i>Xenopus</i>, mouse, and human. We counted a mismatch between two chemically different amino acids like arginine (R) and Valine (V) as a mismatch, while a mismatch between two chemically similar amino acids like arginine (R) and lysine (K) was counted as half a match.</p> <p>* Note that certain domains and motifs' sequences and functions are deductions from Me31B orthologs in other species.</p> |                                              |                                                             |      |

78

## 79 4. Analysis of Me31B's Roles in The Germline

80 To investigate the role of Me31B in the germline, a range of different *me31B*  
81 alleles have been generated using traditional and targeted-motif-mutation approaches.

### 82 4.1 Loss-of-function alleles

83 Nakamura et al. initially produced three loss-of-function alleles of *me31B*,  
84 specifically, *me31B*<sup>Δ1</sup>, *me31B*<sup>Δ2</sup>, and *me31B*<sup>Δ3</sup>, which resulted from partial deletions of  
85 the *me31B* gene (15). The three alleles all caused recessive lethality, with homozygous  
86 mutants failing to develop during the second or third-larval stages, despite no visible  
87 morphological defects. These findings demonstrate that *me31B* is an essential gene for  
88 *Drosophila*. To gain a deeper understanding of its roles in the germline, the researchers  
89 used the *me31B*<sup>Δ</sup> allele to create germline clone strains, where animals carried  
90 homozygous *me31B*<sup>Δ</sup> mutation in the germline but otherwise wild type. In the germline  
91 clone ovaries, egg chambers rarely developed beyond Stage 10, with various  
92 developmental defects such as egg chamber degeneration and germline cell membrane  
93 collapse. Strong *me31B* germline knockdown strains showed similar oogenesis defects  
94 (40), further emphasizing the importance of *me31B* in oogenesis. Crucially, the loss of

95 *me31B* in the germline led to the abnormal translational activation of key germline-  
96 development RNAs, *osk*, and *BicD*, suggesting that Me31B acts as a translation  
97 repressor.

98

#### 99 **4.2 Loss of one *me31B* gene copy**

100 Although the loss of one *me31B* gene copy (*me31B*<sup>Δ</sup> heterozygotes) does not  
101 seem to affect growth in *Drosophila*, the presence of heterozygosity for both *me31B*<sup>Δ</sup>  
102 and other crucial germline or neuron development genes could result in observable  
103 phenotypes in the corresponding tissues. In the germline, a reduction in germ cell  
104 number phenotype was observed in early embryos when one *me31B* gene copy was  
105 lost. Additionally, when one *me31B* gene copy and one copy of germ-plasm-protein  
106 genes like *vas* or *tud* were lost simultaneously, a more severe reduction was observed  
107 (43). This implies that *me31B* has a genetic interaction with germ plasm genes, and the  
108 interaction is crucial for proper germ cell formation. The effects of *me31B*<sup>Δ</sup>  
109 heterozygosity in neurons will be discussed further below (see Me31B in The Soma).

110

#### 111 **4.3 Targeted-domain mutations of Me31B**

112 Target-motif-mutations of *me31B* were generated to investigate the functions of  
113 specific Me31B motifs. To investigate the role of Me31B helicase activity, three  
114 helicase-activity-mutation alleles (*me31B*<sup>E208A</sup>, *me31B*<sup>DVLAAAA</sup>, and *me31B*<sup>R385Q</sup>) were  
115 generated using CRISPR through point mutations in those motifs: DEAD→DAAD,  
116 DVLARAK→DVLAAAA, and HRIGR→HRIGQ (30). These three alleles cause female  
117 sterility dominantly. The sterility is associated with various oogenesis and

118 embryogenesis defects such as egg chamber degenerations, dorsal appendage  
119 abnormalities, and unhatchable eggs. This underscores the crucial role of Me31B's  
120 helicase activity in germline development and fertility. At the molecular level, the  
121 dominant helicase-activity mutations reduce Me31B protein levels and alter the germ  
122 plasm localization pattern of germline mRNA *nos* (encoding protein Nos, a key and  
123 conserved regulator involved in embryo patterning and germ cell development (1, 44-  
124 46)). This suggests that Me31B's helicase activity is involved in stabilizing the protein  
125 and modulating substrate RNAs.

126 To investigate the functions of Me31B's N-ter domain, C-ter domain, and FDF-  
127 binding motif (a partner protein binding motif), three additional target-motif-mutation  
128 alleles have been created. These are *me31B<sup>N-ter</sup>* (containing N-terminal AA 1 – 276),  
129 *me31B<sup>C-ter</sup>* (containing C-terminal AA 277 – 459), and *me31B<sup>FDF</sup>* (point mutations in the  
130 FDF-binding motif which mediates Me31B's interaction with partner proteins like Tral  
131 and Edc3) (30). Homozygous *Drosophila* carrying the three alleles (*me31B<sup>N-ter</sup>*, *me31B<sup>C-</sup>*  
132 *ter*, and *me31B<sup>FDF</sup>*) are viable and can complete oogenesis, indicating that these are  
133 weak alleles of *me31B*. However, homozygotes of the three alleles display varying  
134 degrees of fertility reduction, with *me31B<sup>C-ter</sup>* causing complete sterility in a recessive  
135 manner (associated with embryo patterning defects). At the molecular level, the  
136 *me31B<sup>N-ter</sup>* and *me31B<sup>C-ter</sup>* mutations reduce Me31B protein levels to varying degrees,  
137 while all three mutations (*me31B<sup>N-ter</sup>*, *me31B<sup>C-ter</sup>*, and *me31B<sup>FDF</sup>*) alter Me31B  
138 intracellular localizations in different ways. This suggests that Me31B's N-ter domain, C-  
139 ter domain, and FDF-binding motif all contribute distinct functions to Me31B stability,



140 subcellular localization, and ultimately, fertility.

141

## 142 **5. Me31B Expression and Me31B RNP Granules**

143 *me31B* transcripts are present throughout all stages of oogenesis from early to  
144 late egg development. The transcripts are found in all types of germline cells, including  
145 nurse cells (with a burst of *me31B* transcription at early-to-mid oogenesis, around stage  
146 6 - 7), developing oocytes, and early embryos (0 – 4 hours). The transcripts exhibit a  
147 uniform, cytoplasmic distribution in these cells. However, the transcripts are no longer  
148 detectable in later embryos (after 4 hours) (19).

149 The expression level of Me31B protein parallels that of the *me31B* mRNA.  
150 Me31B is detected in early oogenesis in the germarium (the part of the ovary that  
151 contains undifferentiated germline stem cells) and remains at a relatively low level  
152 during the early stages of oogenesis (stages 1 – 5). However, there is a significant  
153 increase in Me31B around stages 6 – 7, which is consistent with elevated transcription.  
154 Me31B remains at a high level throughout the rest of oogenesis and declines to non-  
155 detectable levels in early embryogenesis (15). Unlike mRNA, Me31B proteins have  
156 specific subcellular localization and aggregation patterns (15, 40, 47) (Figure 1, bottom).  
157 They are observed in the cytoplasm, not the nuclei, of both nurse cells and developing  
158 oocytes. Me31B is concentrated in oocytes, possibly transported from nurse cells via  
159 ring canals (channel-like structures that connect the cytoplasm between the nurse cells  
160 and oocytes). In nurse cells and oocytes, Me31B often takes the form of aggregated  
161 granules. These granules accumulate in specific regions, such as the peri-nuclear  
162 regions of nurse cells (nuage), the cortex of mid-stage oocytes, and the germ plasm

163 area at the posterior pole of mid-to-late-stage oocytes (germ plasm is the special  
164 cytoplasm that contains germ-cell-formation determinants). The granules disperse and  
165 become uniformly distributed in late-stage eggs and early embryos before disappearing  
166 by the cellular blastoderm stage of embryos.

167 The Me31B-containing granules are germline ribonucleoproteins (RNPs), which  
168 are membraneless and liquid-like condensates composed of germline RNAs and  
169 proteins (1, 4, 11, 12, 48-51). These granules are classified into three major groups  
170 based on their molecular compositions, subcellular locations, and morphologies: nuage  
171 granules found around nurse cell nuclei, P-body/sponge body granules dispersed in the  
172 cytoplasm of nurse cells, developing oocytes, and early embryos, and germ plasm  
173 granules at the posterior pole of developing oocytes/embryos. Me31B plays an  
174 important role in regulating the fate of RNAs in the RNPs by interacting with the RNA  
175 and protein constituents, which is an essential process for germline development (9, 47,  
176 52-55).

177

## 178 **6. Functions of Me31B in RNP granules**

### 179 **6.1 Physical properties and dynamics of the granules**

180 RNP granules containing Me31B, such as P-bodies, sponge bodies, nuage  
181 granules, and germ plasm granules, display physical properties similar to sticky, liquid  
182 droplets and are referred to as biomolecular condensates (1, 11, 34, 48, 55-58). A  
183 recent study used Me31B-labeled P-bodies during late oogenesis to early  
184 embryogenesis to illustrate the general physical properties of germline RNPs and how  
185 the properties change with different cellular contexts (34).

186 In mature oocytes, P-bodies labeled with Me31B are widespread and universally  
187 distributed in the bulk oocyte cytoplasm. These micro-sized structures vary in  
188 morphology and are highly dynamic, constantly rearranging through fusion and fission.  
189 The P-body structure is maintained by a variety of physicochemical and biological  
190 forces, including hydrophobic interactions, salt concentrations, RNAs, the cytoskeleton,  
191 and protein-protein interactions (particularly the protein-protein interactions between  
192 Me31B and Tral). Moreover, recombinant Me31B proteins can form spherical  
193 condensates in the presence of a crowding agent, and Me31B's Intrinsically Disordered  
194 Regions (IDRs) play a role in modulating the self-aggregation process, suggesting that  
195 the IDRs may regulate Me31B aggregation within the P-bodies.

196 As the developmental stage progresses from mature oocyte to early embryo, the  
197 physical properties of Me31B-labeled P-bodies change. P-bodies in mature oocytes  
198 maintain typical morphologies and undergo slow rearrangement, with very limited  
199 exchange between Me31B in the P-bodies and the cytoplasm. This limited exchange  
200 suggests that the P-bodies function as storage units for oocyte RNAs. However, in early  
201 embryos after egg activation, the P-bodies become much more dynamic. They disperse  
202 into smaller condensates, contain more highly mobile Me31B, and dissociate from  
203 stored maternal RNAs like *bicoid* (*bcd*). The change from the arrested state in mature  
204 oocytes to the dynamic state in early embryos is believed to occur upon egg activation,  
205 facilitating the disintegration of the P-bodies and the release of the stored RNAs for  
206 translation, enabling further embryogenesis.

207

## 208 **6.2 Me31B interactome in the RNPs.**

209 To gain insight into the functions of Me31B complexes in RNP granules, a  
210 proteomics approach was implemented to isolate Me31B complexes from *Drosophila*  
211 ovaries. Through this approach, the Me31B protein interactome was comprehensively  
212 identified (40), revealing the presence of proteins from four functional groups: RNA  
213 regulators (repressors like Cup and Tral; degraders like PCM and EDC3), cytoskeleton  
214 and motor proteins (like dynein, kinesin, and tubulin components), glycolytic enzymes,  
215 and core germ plasm proteins involved in germ plasm assembly and germ cell formation  
216 (like Vas, Aub, and Tud). This led to the development of a model for a Me31B-centered  
217 functional unit in the RNP granules, with Me31B serving as the central hub (Figure 2).  
218 The proposed model outlines the various components that work in conjunction with  
219 Me31B, highlighting their individual purposes and relationships. Firstly, Me31B  
220 collaborates with RNA repressor partners to enable post-transcriptional regulations over  
221 the RNAs. Secondly, cytoskeleton/motor proteins act as moving tracks and energy  
222 sources for the transportation of the granules. Thirdly, glycolytic enzymes provide ATP  
223 to support the functioning of RNA helicases and motor proteins. Fourthly, Me31B  
224 interacts with core germ plasm proteins, which hints at its possible roles in the assembly  
225 and function of nuage and germ plasm granules.

226 In a subsequent investigation utilizing a comparable proteomics approach, a  
227 Me31B early-embryo interactome was acquired, which corroborated the suggested  
228 model above by revealing the same four protein groups. In addition, when compared  
229 with its ovary interactome counterpart, the Me31B early-embryo interactome showed a

230 significant reduction of core germ plasm proteins, supporting the notion that Me31B  
231 RNP granules differ in composition in different cellular contexts (47).

232 To understand Me31B's RNA interactome, a study utilized an RNA  
233 immunoprecipitation + sequencing (RIP-seq) approach to comprehensively identify  
234 Me31B-bound mRNAs in *Drosophila* early embryos. The results revealed that  
235 transcripts from almost all expressed genes were enriched in the Me31B precipitates  
236 (59). This suggests that Me31B may bind most if not all, expressed germline mRNAs  
237 without specificity. This interpretation was further supported by a Me31B-germline  
238 mRNA co-staining experiment, which found seven representative mRNAs (*osk*, *BicD*,  
239 *bcd*, *nos*, *orb*, *Pgc*, and *gcl*) to colocalize with Me31B granules in various stages of egg  
240 chambers (15). Additionally, the RIP-Seq study has revealed that Me31B has different  
241 effects on its bound mRNAs depending on the cellular contexts (59). To elaborate,  
242 during the early stages of embryonic development (0-1 hour, before the Maternal to  
243 Zygotic Transition (MZT), an event that marks the shift in developmental control from  
244 maternal factors to zygotic gene expression), Me31B binds to nearly all transcripts and  
245 inhibit their translation. However, as the embryos go through MZT (1-5 hours), the  
246 transcripts bound by Me31B undergo progressive changes, and the binding shifts from  
247 repressing translation to destabilizing the mRNAs. This highlights the dynamic RNA  
248 interactome and functions of Me31B throughout germline development.

249

### 250 **6.3 Me31B repressor complex on *nos* mRNA**

251 To explain how a Me31B-containing repressor complex can suppress and break  
252 down mRNAs during germline development, we reference the *nanos* (*nos*) mRNA

253 repression complex model proposed by Gotze et al (54) and its associated sources. The  
254 intricate suppression and degradation of *nos* mRNA is crucial for the proper timing and  
255 location of Nos protein production, which ultimately contributes to *Drosophila* embryo  
256 body patterning and germ cell formation (10, 60-62). This repression mechanism relies  
257 on the collaboration of Me31B and other RNA repression and degradation factors, such  
258 as Smaug (Smg), Belle (Bel), Cup, Tral, the CCR4-NOT complex, and more (Figure 3)  
259 (31, 42, 54, 63-66). The model begins with Smaug (Smg), an RNA repressor/degrader  
260 during the MTZ of embryogenesis, binding to the two Smaug Recognition Elements  
261 (SREs) in the 3' UTR of *nos*. Smg then recruits Cup, which further binds eIF4E, Tral,  
262 and Me31B directly or indirectly. Me31B interacts with Tral via its FDF-binding motif to  
263 Tral's FDF motif, and the Me31B-Tral complex along the length of *nos* RNA, coating it  
264 and inhibiting its translation. Me31B or eIF4E may also bind Belle (Bel), another  
265 repressor helicase, to cooperatively repress *nos* RNA. Finally, Me31B and/or Smaug  
266 recruits the deadenylation complex CCR4-NOT to digest the *nos* from its 3' poly-A tail  
267 and destabilize the RNA for degradation. It is important to note that different repression  
268 models may be at work on *nos* mRNA at different developmental stages. For example,  
269 in late oogenesis rather than early embryogenesis, *nos* repression relies on Glorund  
270 (Glo). It directly binds to *nos* mRNA at a 3'-UTR sequence different from the SREs and  
271 recruits another repressor dFMRP to inhibit *nos* translation (46, 67-69). Despite this, the  
272 example of *nos* repressor complex suggests that Me31B may play repressor roles on  
273 germline mRNAs by directly coating the mRNA to shield it from translational machinery  
274 and facilitating the communication/recruitment of other mRNA-specific (like Smg) or

275 non-specific (like Cup and Tral) repressors.

276

#### 277 **6.4 Interaction between Me31B-containing P-bodies and U bodies**

278 Recent research revealed physical and genetic connections between Me31B-  
279 containing P-bodies and other RNP structures like U bodies. U bodies, named after their  
280 Uridine-rich small nuclear ribonucleoproteins (U snRNPs), are believed to be the  
281 cytoplasmic sites of snRNP biogenesis, assembly, and storage before they are  
282 transported into the nucleus for mRNA processing (70). While distinct entities within  
283 *Drosophila* germline cells (70), P-bodies and U bodies exhibit evidence of mutual  
284 interaction. For instance, although not all P-bodies are linked with U bodies, U bodies  
285 consistently associate with P bodies (70, 71). Additionally, mutations affecting key  
286 components of both structures (such as SMN in U bodies and Cup in P-bodies) result in  
287 similar nuclear morphology phenotypes, disrupting their typical morphology and  
288 distribution pattern (72). These findings suggest a dependence of Me31B-containing P-  
289 bodies on other RNP structures like U bodies in RNP assembly and hint at potential  
290 collaboration in the intracellular trafficking of snRNPs and mRNPs (72).

291

### 292 **7. Me31B in the Male Germline**

293 Research on Me31B's role in the male germline is limited compared to that in  
294 females. However, recent studies have shown that this maternal gene also functions in  
295 the male germline cells. In one study, Me31B was found to be expressed in male testis  
296 cells like germline stem cells (GSCs), spermatogonia (SG), and spermatocytes (73).  
297 Me31B was observed in cytoplasmic P-bodies, where it co-localizes with Decapping

298 protein 1 (Dcp1) and exoribonuclease Pacman (PCM), both of which are involved in  
299 RNA degradation pathways. The study suggested that Me31B and Dcp1 work together  
300 to bind mRNAs and present them for degradation by PCM, which is required for male  
301 *Drosophila* spermatogenesis and fertility. Interestingly, the co-localization pattern of  
302 Me31B-Dcp1-PCM in male cells was similar to that seen in P-bodies in female nurse  
303 cells (32, 74), indicating a potentially common mRNA regulation pathway mediated by  
304 Me31B-containing P-bodies in both sexes.

305 In a second study, Me31B's role in maintaining *Drosophila* male germline stem  
306 cell (GSC) homeostasis was revealed (75). The study indicated that Me31B is vital in  
307 preventing excessive de-differentiation of spermatogonia back into GSC, which may  
308 result from the failure in downregulating the expression of the GSC-maintenance and  
309 germ cell identity regulator *nos*. The study proposed a model explaining Me31B's role in  
310 GSC homeostasis. The model suggests that *nos* mRNA is initially translated in GSCs  
311 and their immediate daughter cells, which helps maintain the GSC's stem cell status.  
312 Then, as GSCs give rise to SGs, Me31B binds and translationally represses *nos* mRNA,  
313 causing a Nos protein level decrease in the SGs, thereby promoting SG differentiation.  
314 This mechanism of action bears resemblance to the function of Me31B in suppressing  
315 *nos* mRNA translation during early embryo development, hinting at a comparable role of  
316 Me31B in regulating germline mRNAs in both sexes.

317 According to a third study, Me31B is associated with eIF4E-3, a specific isoform  
318 of Eukaryotic translation initiation factor 4E that is expressed in *Drosophila* testis and  
319 essential for spermatogenesis (76). The research demonstrated that the two proteins  
320 co-express, co-immunoprecipitate, and co-localize in male germline cells such as



321 spermatocytes. The Me31B-eIF4E-3 interaction connects the repressive function of  
322 Me31B to the regulation of translation.

323

## 324 **8. Me31B in The Soma**

325         Beyond the germline, it is noteworthy that Me31B also plays pivotal biological  
326 roles in somatic cells, with a particular emphasis on its involvement in neuronal  
327 functions. In fact, both *Drosophila* and mammalian neurons contain dynamic,  
328 cytoplasmic RNP granules known as “neuronal granules” (77-81) that share many  
329 similarities with germline RNPs in terms of morphology, composition, and function.  
330 These granules often contain RNA regulators such as Me31B, FMRP (dFMR1 in  
331 *Drosophila*), Staufén (Stau), and ATX-2 (32, 82), and appear to be involved in the  
332 storage and regulation of translationally repressed mRNAs (83-88). In the following  
333 paragraphs, we will examine a range of studies (conducted both in cell cultures and  
334 brains) that explore Me31B’s impact on neuron physiology, development, and neuronal  
335 mRNA metabolism.

336         In primary culture *Drosophila* neurons, the overexpression of Me31B leads to  
337 abnormal down-regulation of high-order dendritic complexity. Conversely, the  
338 knockdown of Me31B yielded opposite effects, with all phenotypes dependent on  
339 Me31B’s DEAD-box motif. These results suggest Me31B’s important role in dendrite  
340 morphogenesis (32).

341         In adult *Drosophila* brains, Me31B is present in several types of neuronal cells,  
342 including olfactory projection neurons, local interneurons, pacemaker neurons,  
343 mushroom-body neurons, and glial cells (89). In olfactory projection neurons (PNs),

344 Me31B is essential for the translational repression of CaMKII reporter mRNA, which is a  
345 miRNA-regulated, synapse-localizing mRNA. Additionally, the *me31B* gene and its  
346 genetic interaction with *atx2* and *dFMR1* are necessary for long-term olfactory  
347 habituation (LTH), a behavior trait involving olfactory PNs, and LTH-associated neuron  
348 structural plasticity (90-92). In circadian pacemaker neurons, Me31B associates with  
349 and genetically interacts with *atx2* to maintain rhythmic circadian behaviors. This  
350 process is hypothetically linked to the repression functions of an Atx2-Me31B-NOT1  
351 complex (93). In mushroom body  $\gamma$  neurons (neurons involved in learning and memory),  
352 Me31B-containing neuronal granules condense, recruit repressor protein Imp and its  
353 target mRNA *profilin*, and inhibit *profilin* translation during neuron aging (94).  
354 Conversely, the granules de-condense, release Imp and *profilin* mRNA, and de-repress  
355 *profilin* translation upon neuron stimulation by a biogenic peptide (95).

356 The Me31B ortholog, DDX6, can be located in the hippocampal neurons within  
357 mammals. As the neurons mature, DDX6-containing neuronal granules will disassemble  
358 into smaller-sized granules, but they will re-assemble into large granules if synaptic  
359 activities are inhibited. Additionally, DDX6 plays an important role in synaptic functions  
360 such as the appropriate clustering of a postsynaptic marker protein in neuronal  
361 dendrites and the frequency of  $\text{Ca}^{2+}$  peaking (96).

362 Me31B is not only found in neurons but also non-neuron soma. Me31B plays a  
363 crucial role in the cytoplasmic foci formation of core P-body components Dcp1 and Pcm  
364 in *Drosophila* wing imaginal discs (undifferentiated precursor cells of *Drosophila* wing). It  
365 also helps in the recruitment of repressor dFMR1 to P-bodies, and *bantam* and *miR2*  
366 miRNA- mediated translational repression (82). In *Drosophila* eyes, Me31B, along with

367 its partner repressor Tral, is needed for a *dFMR1* gene-mediated “rough eye” phenotype  
368 (32).

369 Numerous studies examined in this section have provided convincing evidence  
370 that Me31B, or its orthologs like DDX6, plays a critical role in regulating neuron  
371 physiology, development, and synaptic activities. Me31B likely accomplishes this by  
372 forming and modifying neuronal RNP granules, which in turn regulates of the translation  
373 of neuronal mRNAs in a spatiotemporal manner. Storage, localization, repression,  
374 activation, and decay of these transcripts enable the neurons to respond appropriately  
375 to intracellular and extracellular signals (96-98). This mode of action of Me31B in  
376 neuronal (and other somatic) granules is similar to what was observed in the germline,  
377 indicating that Me31B may be a necessary common component for the repressing  
378 RNPs in various cell types and species.

379

## 380 **9. How Does Me31B Affect Target mRNAs?**

381 Many studies have identified Me31B as a general repressor in various RNPs, yet  
382 the exact means by which the protein affects target mRNA remains elusive. A growing  
383 body of evidence suggests Me31B promotes RNA storage, repression, and degradation  
384 through a network of interrelated mechanisms, including direct RNA coating, interaction  
385 with RNA-induced silencing complex (RISC), decapping factors, deadenylation  
386 complexes, and ribonucleases, as well as interfering with ribosomes (a schematic  
387 illustration showed in Figure 4). Given the limited research on *Drosophila* Me31B, we  
388 also draw upon studies of its orthologs (such as DDX6/RCK in humans, p54 in mice,  
389 Xp54 in frogs, CGH-1 in worms, Dhh1p in yeast) to shed light how this conserved family

390 of helicases affects target mRNAs.

391

## 392 **9.1 RNA coating.**

393 According to the following studies, it is believed that Me31B functions as a  
394 repressor of target mRNAs by forming oligomers on them, coating them, and potentially  
395 shielding them from translation machinery. One study proposed that Me31B-Tral  
396 repressor dimers polymerize along *nos* mRNA (54). Another study utilizing an Xp54  
397 RNA-tethering assay found that Xp54 oligomerizes on mRNA in an RNA- and helicase  
398 activity-dependent manner (99). Similarly, in a binding assay with recombinant DDX6  
399 proteins, DDX6 polymerized and bound to single-stranded RNA targets (100).

400

## 401 **9.2 Participation in RISC-mediated pathways**

402 RISCs are cellular complexes that play a vital role in the mRNA regulation  
403 pathway. Equipped with small RNAs, these complexes guide themselves to  
404 complementary or partially complementary target mRNAs, using effector proteins like  
405 Argonaute (AGO) to achieve translational repression or degradation (101-104). RISC-  
406 mediated RNA regulation pathways rely on Me31B, or its equivalents in other organisms  
407 (105-112), to facilitate relevant mRNA degradation events such as P-body assembly (29,  
408 106, 110, 113-115), mRNA decapping (41, 116-119), deadenylation (38, 117, 120-122),  
409 and nuclease digestion (47, 89, 108, 123, 124). While human DDX6 and fly Me31B act  
410 as repressors for RISC-targeted mRNAs, they do not cleave the mRNAs (which is  
411 usually done by nucleases like AGO) (105). This is consistent with Me31B's role as a  
412 general repressor, rather than a degrader. When working with decapping factors, yeast

413 Dhh1p promotes efficient mRNA decapping and directly interacts with main decapping  
414 enzymes Dcp1/Dcp2 and other decapping activators like Pat1 and Edc3 (116, 117).  
415 However, Dhh1p is believed to work by repressing translation initiation, rather than  
416 stimulating the decapping enzymes (Dcp1/Dcp2) (41). During mRNA deadenylation,  
417 Me31B interacts physically with a highly conserved deadenylation complex CCR4-NOT  
418 in yeast, fruit fly, and human cells (38, 117, 120-122). It is important to mention that in  
419 humans, DDX6 binds to the NOT1 protein which acts as the assembly scaffold of the  
420 CCR4-NOT complex. This binding stimulates DDX6's ATP hydrolysis activity (125) and  
421 is crucial for RNA repression and silencing (38, 111, 125). This suggests that DDX6's  
422 ATPase activity plays a significant role in its function as a repressor.

423

### 424 **9.3 Interaction with ribosomes.**

425 Research has shown that yeast Dhh1p interacts with ribosomes, potentially  
426 modulating translation. Recombinant Dhh1p at high concentrations can prevent the  
427 formation of translation preinitiation complexes (41). Dhh1p also binds preferentially to  
428 mRNAs containing non-optimal codons (i.e., low translation efficiency mRNAs), leading  
429 to an accumulation of slow-moving ribosomes and the mRNA's degradation (126, 127).  
430 Additionally, Dhh1p can physically interact with eukaryotic ribosomes and certain  
431 ribosomal RNAs (126).

432 It should be noted that Me31B's mechanisms of action discussed in this section  
433 (Figure 4), such as RNA coating, interacting with RISC, decapping enzymes,  
434 deadenylation complexes, degradation enzymes, and modulating ribosomes, are  
435 interconnected and often converge as sequential processing steps involved in RNA

436 regulation.

437

## 438 **10. Perspectives and Unanswered Questions**

439 There are still a lot of questions when it comes to the molecular biology of the  
440 Me31B. We will delve into several of them, as we believe their answers will give us a  
441 better understanding of this conserved helicase family.

### **Box 1. Unanswered Questions**

1. What is the role of Me31B in an RNP?
  - a. If Me31B is a repressor, scaffold, and/or remodeler, how does Me31B transit between different functions to render different fates to mRNAs?
2. Does Me31B's function rely on the protein's localization in RNPs?
3. What's Me31B's molecular level working mechanism?
  - a. How does Me31B interact with RNAs and protein partners?
  - b. What are the biological implications of these interactions?
  - c. How does Me31B adapt to changing cellular contexts to remodel the RNPs and output the appropriate functions?

442 What is the role of Me31B in an RNP? Based on the research reviewed, Me31B  
443 has been identified as a versatile player, serving as a general repressor, an RNP  
444 scaffold/hub, and an RNP remodeler. As a general repressor, Me31B exhibits low RNA-  
445 binding specificity and inhibits translation without modifying the RNA. As an RNP  
446 scaffold/hub, Me31B coordinates the assembly of a repressor RNP on a target RNA by  
447 recruiting and/or being recruited by other factors. Me31B's interaction with these factors  
448 will determine the RNA's fate. As an RNP remodeler, Me31B can dynamically alter an  
449 RNP's composition, morphology, and function in response to developmental changes

450 and cellular contexts. This allows Me31B-bound mRNAs to experience different  
451 outcomes, including degradation, repression for storage, or release for translational  
452 activation. This naturally raises the question of how Me31B can transit between these  
453 different functions. An earlier study proposed an intriguing model suggesting that  
454 Me31B alters RNP functions by component exchanges (89). This idea is supported by  
455 previous research indicating that Me31B's C-terminal RecA-like domain binds  
456 exclusively to different partners, including Edc3, Tral, ATX2, and NOT1 (33, 93, 128).  
457 The binding of Edc3 with DDX6 leads to the assembly of a decapping complex  
458 (containing decapping factors Dcp1, Edc4, and Dcp2), while the binding of Tral with  
459 DDX6 results in a repressing complex (containing eIF4E binding protein Cup, which can  
460 inhibit the decapping of bound mRNA). Such a transition in the fate of bound mRNA  
461 would be significant (129). Furthermore, Pat and Edc3's binding interferes and  
462 competes with the RNA binding of yeast Dhh1p (128), suggesting a flexible Dhh1p-RNA  
463 interaction and a possible mechanism for RNA release.

464         The role of Me31B and its dependence on the protein's localization into RNP  
465 granules has sparked much debate. However, a recent study shed light on this topic by  
466 introducing a *Drosophila* strain carrying mutations that prevent Me31B's localization to  
467 RNP granules (30). By disrupting Me31B's FDF-binding motif, the mutant Me31B is  
468 dispersed throughout the germline instead of aggregating onto RNP granules.  
469 Interestingly, this dispersed Me31B only slightly decreased fertility and did not appear to  
470 affect *Drosophila* oogenesis, embryogenesis, or the formation of germline RNPs (as  
471 indicated by other marker proteins Tral and Cup). These findings suggest that Me31B's  
472 localization to RNP granules may not be necessary for its function. One possible

473 explanation is that Me31B is abundant enough in the germline to interact with the RNPs  
474 and provide essential mRNA regulation functions. It would be valuable to investigate  
475 whether this concept applies to other species or cell systems.

476         Understanding the full working mechanism of Me31B is a complex yet crucial  
477 endeavor. How does Me31B interact with RNAs and various protein partners, and what  
478 are the implications of the interactions? Furthermore, how does Me31B adapt to  
479 changing cellular contexts to remodel the RNPs and output the appropriate functions?  
480 Although past research has provided some answers, a comprehensive understanding of  
481 Me31B's working mechanism remains elusive. One promising future approach may  
482 involve the systematic generation of weak, target-motif-mutation alleles of *me31B*.  
483 These tools could prove invaluable in uncovering the individual roles of different Me31B  
484 motifs, ultimately leading to a more complete understanding of the protein's overall  
485 mechanism and function.

486

## 487 **Declaration of Competing Interest**

488         There are no competing interests.

489

## 490 **Data Availability**

491         No research data was generated in the article.

492



## 493 **Acknowledgment**

494           Research in the Gao lab is supported by the National Institute of Child Health  
495 and Human Development (Grant number: R15HD092925).

496

## 497 **References**

- 498 1.       Trcek T, Lehmann R. Germ granules in *Drosophila*. *Traffic*. 2019;20(9):650-60.  
499 DOI: 10.1111/tra.12674.
- 500 2.       St Johnston D. Polarity and axis formation in the *Drosophila* female germ line.  
501 *Curr Top Dev Biol*. 2023;154:73-97. DOI: 10.1016/bs.ctdb.2023.02.002.
- 502 3.       Grmai L, Pozmanter C, Van Doren M. The Regulation of Germline Sex  
503 Determination in *Drosophila* by Sex lethal. *Sex Dev*. 2022;16(5-6):323-8. DOI:  
504 10.1159/000521235.
- 505 4.       Cassani M, Seydoux G. P-body-like condensates in the germline. *Semin Cell*  
506 *Dev Biol*. 2024;157:24-32. DOI: 10.1016/j.semcdb.2023.06.010.
- 507 5.       Chiappetta A, Liao J, Tian S, Trcek T. Structural and functional organization of  
508 germ plasm condensates. *Biochem J*. 2022;479(24):2477-95. DOI:  
509 10.1042/BCJ20210815.
- 510 6.       Schisa JA, Elswad MT. An Emerging Role for Post-translational Modifications in  
511 Regulating RNP Condensates in the Germ Line. *Front Mol Biosci*. 2021;8:658020. DOI:  
512 10.3389/fmolb.2021.658020.
- 513 7.       Mukherjee N, Mukherjee C. Germ cell ribonucleoprotein granules in different  
514 clades of life: From insects to mammals. *Wiley Interdiscip Rev RNA*. 2021;12(4):e1642.  
515 DOI: 10.1002/wrna.1642.

- 516 8. Schupbach T, Wieschaus E. Germline autonomy of maternal-effect mutations  
517 altering the embryonic body pattern of *Drosophila*. *Dev Biol*. 1986;113(2):443-8. DOI:  
518 10.1016/0012-1606(86)90179-x.
- 519 9. Arkov AL, Ramos A. Building RNA-protein granules: insight from the germline.  
520 *Trends Cell Biol*. 2010;20(8):482-90. DOI: 10.1016/j.tcb.2010.05.004.
- 521 10. Wang JT, Seydoux G. Germ cell specification. *Adv Exp Med Biol*. 2013;757:17-  
522 39. DOI: 10.1007/978-1-4614-4015-4\_2.
- 523 11. Gao M, Arkov AL. Next generation organelles: structure and role of germ  
524 granules in the germline. *Mol Reprod Dev*. 2013;80(8):610-23. DOI: 10.1002/mrd.22115.
- 525 12. Lehmann R. Germ Plasm Biogenesis--An Oskar-Centric Perspective. *Curr Top*  
526 *Dev Biol*. 2016;116:679-707. DOI: 10.1016/bs.ctdb.2015.11.024.
- 527 13. Swartz SZ, Wessel GM. Germ Line Versus Soma in the Transition from Egg to  
528 Embryo. *Curr Top Dev Biol*. 2015;113:149-90. DOI: 10.1016/bs.ctdb.2015.06.003.
- 529 14. Eichler CE, Hakes AC, Hull B, Gavis ER. Compartmentalized oskar degradation  
530 in the germ plasm safeguards germline development. *Elife*. 2020;9. DOI:  
531 10.7554/eLife.49988.
- 532 15. Nakamura A, Amikura R, Hanyu K, Kobayashi S. Me31B silences translation of  
533 oocyte-localizing RNAs through the formation of cytoplasmic RNP complex during  
534 *Drosophila* oogenesis. *Development*. 2001;128(17):3233-42. DOI:  
535 10.1242/dev.128.17.3233.
- 536 16. Balak C, Benard M, Schaefer E, Iqbal S, Ramsey K, Ernoult-Lange M, et al. Rare  
537 De Novo Missense Variants in RNA Helicase DDX6 Cause Intellectual Disability and

- 538 Dysmorphic Features and Lead to P-Body Defects and RNA Dysregulation. *Am J Hum*  
539 *Genet.* 2019;105(3):509-25. DOI: 10.1016/j.ajhg.2019.07.010.
- 540 17. Alves-Rodrigues I, Mas A, Diez J. *Xenopus* Xp54 and human RCK/p54 helicases  
541 functionally replace yeast Dhh1p in brome mosaic virus RNA replication. *J Virol.*  
542 2007;81(8):4378-80. DOI: 10.1128/JVI.02246-06.
- 543 18. Weston A, Sommerville J. Xp54 and related (DDX6-like) RNA helicases: roles in  
544 messenger RNP assembly, translation regulation and RNA degradation. *Nucleic Acids*  
545 *Res.* 2006;34(10):3082-94. DOI: 10.1093/nar/gkl409.
- 546 19. de Valoir T, Tucker MA, Belikoff EJ, Camp LA, Bolduc C, Beckingham K. A  
547 second maternally expressed *Drosophila* gene encodes a putative RNA helicase of the  
548 "DEAD box" family. *Proc Natl Acad Sci U S A.* 1991;88(6):2113-7. DOI:  
549 10.1073/pnas.88.6.2113.
- 550 20. Cargill M, Venkataraman R, Lee S. DEAD-Box RNA Helicases and Genome  
551 Stability. *Genes (Basel).* 2021;12(10). DOI: 10.3390/genes12101471.
- 552 21. Li F, Fountzilas C, Puzanov I, Attwood KM, Morrison C, Ling X. Multiple functions  
553 of the DEAD-box RNA helicase, DDX5 (p68), make DDX5 a superior oncogenic  
554 biomarker and target for targeted cancer therapy. *Am J Cancer Res.* 2021;11(10):5190-  
555 213. DOI: 10.1186/s13046-023-02787-x.
- 556 22. Xu C, Cao Y, Bao J. Building RNA-protein germ granules: insights from the  
557 multifaceted functions of DEAD-box helicase Vasa/Ddx4 in germline development. *Cell*  
558 *Mol Life Sci.* 2021;79(1):4. DOI: 10.1007/s00018-021-04069-1.

- 559 23. Weis K, Hondele M. The Role of DEAD-Box ATPases in Gene Expression and  
560 the Regulation of RNA-Protein Condensates. *Annu Rev Biochem.* 2022;91:197-219.  
561 DOI: 10.1146/annurev-biochem-032620-105429.
- 562 24. Ali MAM. DEAD-box RNA helicases: The driving forces behind RNA metabolism  
563 at the crossroad of viral replication and antiviral innate immunity. *Virus Res.*  
564 2021;296:198352. DOI: 10.1016/j.virusres.2021.198352.
- 565 25. Weis K. Dead or alive: DEAD-box ATPases as regulators of ribonucleoprotein  
566 complex condensation. *Biol Chem.* 2021;402(5):653-61. DOI: 10.1515/hsz-2020-0381.
- 567 26. Overwijn D, Hondele M. DEAD-box ATPases as regulators of biomolecular  
568 condensates and membrane-less organelles. *Trends Biochem Sci.* 2023;48(3):244-58.  
569 DOI: 10.1016/j.tibs.2022.10.001.
- 570 27. Khemici V, Linder P. RNA helicases in RNA decay. *Biochem Soc Trans.*  
571 2018;46(1):163-72. DOI: 10.1042/BST20170052.
- 572 28. Minshall N, Thom G, Standart N. A conserved role of a DEAD box helicase in  
573 mRNA masking. *RNA.* 2001;7(12):1728-42. DOI: 10.1017/s135583820101158x.
- 574 29. Minshall N, Kress M, Weil D, Standart N. Role of p54 RNA helicase activity and  
575 its C-terminal domain in translational repression, P-body localization and assembly. *Mol*  
576 *Biol Cell.* 2009;20(9):2464-72. DOI: 10.1091/mbc.E09-01-0035.
- 577 30. Kara E, McCambridge A, Proffer M, Dilts C, Pumnea B, Eshak J, et al. Mutational  
578 analysis of the functional motifs of the DEAD-box RNA helicase Me31B/DDX6 in  
579 *Drosophila* germline development. *FEBS Lett.* 2023;597(14):1848-67. DOI:  
580 10.1002/1873-3468.14668.

- 581 31. Tritschler F, Eulalio A, Helms S, Schmidt S, Coles M, Weichenrieder O, et al.  
582 Similar modes of interaction enable Trailer Hitch and EDC3 to associate with DCP1 and  
583 Me31B in distinct protein complexes. *Mol Cell Biol.* 2008;28(21):6695-708. DOI:  
584 10.1128/MCB.00759-08.
- 585 32. Barbee SA, Estes PS, Cziko AM, Hillebrand J, Luedeman RA, Collier JM, et al.  
586 Staufen- and FMRP-containing neuronal RNPs are structurally and functionally related  
587 to somatic P bodies. *Neuron.* 2006;52(6):997-1009. DOI: 10.1016/j.neuron.2006.10.028.
- 588 33. Tritschler F, Braun JE, Eulalio A, Truffault V, Izaurralde E, Weichenrieder O.  
589 Structural basis for the mutually exclusive anchoring of P body components EDC3 and  
590 Tral to the DEAD box protein DDX6/Me31B. *Mol Cell.* 2009;33(5):661-8. DOI:  
591 10.1016/j.molcel.2009.02.014.
- 592 34. Sankaranarayanan M, Emenecker RJ, Wilby EL, Jahnel M, Trussina I, Wayland  
593 M, et al. Adaptable P body physical states differentially regulate bicoid mRNA storage  
594 during early Drosophila development. *Dev Cell.* 2021;56(20):2886-901 e6. DOI:  
595 10.1016/j.devcel.2021.09.021.
- 596 35. Huang JH, Ku WC, Chen YC, Chang YL, Chu CY. Dual mechanisms regulate the  
597 nucleocytoplasmic localization of human DDX6. *Sci Rep.* 2017;7:42853. DOI:  
598 10.1038/srep42853.
- 599 36. Peter D, Ruscica V, Bawankar P, Weber R, Helms S, Valkov E, et al. Molecular  
600 basis for GIGYF-Me31B complex assembly in 4EHP-mediated translational repression.  
601 *Genes Dev.* 2019;33(19-20):1355-60. DOI: 10.1101/gad.329219.119.
- 602 37. Ozgur S, Basquin J, Kamenska A, Filipowicz W, Standart N, Conti E. Structure of  
603 a Human 4E-T/DDX6/CNOT1 Complex Reveals the Different Interplay of DDX6-Binding

- 604 Proteins with the CCR4-NOT Complex. *Cell Rep.* 2015;13(4):703-11. DOI:  
605 10.1016/j.celrep.2015.09.033.
- 606 38. Chen Y, Boland A, Kuzuoglu-Ozturk D, Bawankar P, Loh B, Chang CT, et al. A  
607 DDX6-CNOT1 complex and W-binding pockets in CNOT9 reveal direct links between  
608 miRNA target recognition and silencing. *Mol Cell.* 2014;54(5):737-50. DOI:  
609 10.1016/j.molcel.2014.03.034.
- 610 39. Layana C, Vilardo ES, Corujo G, Hernández G, Rivera-Pomar R. Distinct  
611 domains of Me31B interact with different eIF4E isoforms in the male germ line of  
612 *Drosophila melanogaster*. *bioRxiv.* 2021:2021.03.23.436655. DOI:  
613 10.1101/2021.03.23.436655.
- 614 40. DeHaan H, McCambridge A, Armstrong B, Cruse C, Solanki D, Trinidad JC, et al.  
615 An in vivo Proteomic Analysis of the Me31B Interactome in *Drosophila* Germ Granules.  
616 *FEBS Lett.* 2017. DOI: 10.1002/1873-3468.12854.
- 617 41. Coller J, Parker R. General translational repression by activators of mRNA  
618 decapping. *Cell.* 2005;122(6):875-86. DOI: 10.1016/j.cell.2005.07.012.
- 619 42. Liao SE, Kandasamy SK, Zhu L, Fukunaga R. DEAD-box RNA helicase Belle  
620 posttranscriptionally promotes gene expression in an ATPase activity-dependent  
621 manner. *RNA.* 2019;25(7):825-39. DOI: 10.1261/rna.070268.118.
- 622 43. Thomson T, Liu N, Arkov A, Lehmann R, Lasko P. Isolation of new polar granule  
623 components in *Drosophila* reveals P body and ER associated proteins. *Mech Dev.*  
624 2008;125(9-10):865-73. DOI: 10.1016/j.mod.2008.06.005.
- 625 44. Oulhen N, Wessel GM. Every which way--nanos gene regulation in echinoderms.  
626 *Genesis.* 2014;52(3):279-86. DOI: 10.1002/dvg.22737.

- 627 45. Kugler JM, Lasko P. Localization, anchoring and translational control of oskar,  
628 gurken, bicoid and nanos mRNA during Drosophila oogenesis. Fly (Austin).  
629 2009;3(1):15-28. DOI: 10.4161/fly.3.1.7751.
- 630 46. Warden MS, DeRose EF, Tamayo JV, Mueller GA, Gavis ER, Hall TMT. The  
631 translational repressor Glorund uses interchangeable RNA recognition domains to  
632 recognize Drosophila nanos. Nucleic Acids Res. 2023;51(16):8836-49. DOI:  
633 10.1093/nar/gkad586.
- 634 47. McCambridge A, Solanki D, Olchawa N, Govani N, Trinidad JC, Gao M.  
635 Comparative Proteomics Reveal Me31B's Interactome Dynamics, Expression  
636 Regulation, and Assembly Mechanism into Germ Granules during Drosophila Germline  
637 Development. Sci Rep. 2020;10(1):564. DOI: 10.1038/s41598-020-57492-y.
- 638 48. Bose M, Lampe M, Mahamid J, Ephrussi A. Liquid-to-solid phase transition of  
639 oskar ribonucleoprotein granules is essential for their function in Drosophila embryonic  
640 development. Cell. 2022;185(8):1308-24 e23. DOI: 10.1016/j.cell.2022.02.022.
- 641 49. Hakes AC, Gavis ER. Plasticity of Drosophila germ granules during germ cell  
642 development. PLoS Biol. 2023;21(4):e3002069. DOI: 10.1371/journal.pbio.3002069.
- 643 50. Vo HDL, Wahiduzzaman, Tindell SJ, Zheng J, Gao M, Arkov AL. Protein  
644 components of ribonucleoprotein granules from Drosophila germ cells oligomerize and  
645 show distinct spatial organization during germline development. Sci Rep.  
646 2019;9(1):19190. DOI: 10.1038/s41598-019-55747-x.
- 647 51. Valentino M, Ortega BM, Ulrich B, Doyle DA, Farnum ED, Joiner DA, et al.  
648 Computational modeling offers new insight into Drosophila germ granule development.  
649 Biophys J. 2022;121(8):1465-82. DOI: 10.1016/j.bpj.2022.03.014.

- 650 52. Voronina E, Seydoux G, Sassone-Corsi P, Nagamori I. RNA granules in germ  
651 cells. *Cold Spring Harb Perspect Biol.* 2011;3(12). DOI: 10.1101/cshperspect.a002774.
- 652 53. Rangan P, DeGennaro M, Jaime-Bustamante K, Coux RX, Martinho RG,  
653 Lehmann R. Temporal and spatial control of germ-plasm RNAs. *Curr Biol.*  
654 2009;19(1):72-7. DOI: 10.1016/j.cub.2008.11.066.
- 655 54. Gotze M, Dufourt J, Ihling C, Rammelt C, Pierson S, Sambrani N, et al.  
656 Translational repression of the *Drosophila* nanos mRNA involves the RNA helicase  
657 Belle and RNA coating by Me31B and Trailer hitch. *RNA.* 2017. DOI:  
658 10.1261/rna.062208.117.
- 659 55. Sankaranarayanan M, Emenecker RJ, Jahnel M, Trussina IREA, Wayland M,  
660 Alberti S, et al. The arrested state of processing bodies supports mRNA regulation in  
661 early development. *bioRxiv.* 2021:2021.03.16.435709. DOI:  
662 10.1101/2021.03.16.435709.
- 663 56. Fare CM, Villani A, Drake LE, Shorter J. Higher-order organization of  
664 biomolecular condensates. *Open Biol.* 2021;11(6):210137. DOI: 10.1098/rsob.210137.
- 665 57. Hubstenberger A, Noble SL, Cameron C, Evans TC. Translation repressors, an  
666 RNA helicase, and developmental cues control RNP phase transitions during early  
667 development. *Dev Cell.* 2013;27(2):161-73. DOI: 10.1016/j.devcel.2013.09.024.
- 668 58. Langerak S, Trombley A, Patterson JR, Leroux D, Couch A, Wood MP, Schisa  
669 JA. Remodeling of the endoplasmic reticulum in *Caenorhabditis elegans* oocytes is  
670 regulated by CGH-1. *Genesis.* 2019;57(2):e23267. DOI: 10.1002/dvg.23267.



- 671 59. Wang M, Ly M, Lugowski A, Laver JD, Lipshitz HD, Smibert CA, Rissland OS.  
672 ME31B globally represses maternal mRNAs by two distinct mechanisms during the  
673 *Drosophila* maternal-to-zygotic transition. *Elife*. 2017;6. DOI: 10.7554/eLife.27891.
- 674 60. Wang C, Lehmann R. Nanos is the localized posterior determinant in *Drosophila*.  
675 *Cell*. 1991;66(4):637-47. DOI: 10.1016/0092-8674(91)90110-k.
- 676 61. Gavis ER, Lehmann R. Translational regulation of nanos by RNA localization.  
677 *Nature*. 1994;369(6478):315-8. DOI: 10.1038/369315a0.
- 678 62. Bergsten SE, Gavis ER. Role for mRNA localization in translational activation but  
679 not spatial restriction of nanos RNA. *Development*. 1999;126(4):659-69. DOI:  
680 10.1242/dev.126.4.659.
- 681 63. Wilhelm JE, Hilton M, Amos Q, Henzel WJ. Cup is an eIF4E binding protein  
682 required for both the translational repression of oskar and the recruitment of Barentsz. *J*  
683 *Cell Biol*. 2003;163(6):1197-204. DOI: 10.1083/jcb.200309088.
- 684 64. Nelson MR, Leidal AM, Smibert CA. *Drosophila* Cup is an eIF4E-binding protein  
685 that functions in Smaug-mediated translational repression. *EMBO J*. 2004;23(1):150-9.  
686 DOI: 10.1038/sj.emboj.7600026.
- 687 65. Nakamura A, Sato K, Hanyu-Nakamura K. *Drosophila* cup is an eIF4E binding  
688 protein that associates with Bruno and regulates oskar mRNA translation in oogenesis.  
689 *Dev Cell*. 2004;6(1):69-78. DOI: 10.1016/s1534-5807(03)00400-3.
- 690 66. Jeske M, Moritz B, Anders A, Wahle E. Smaug assembles an ATP-dependent  
691 stable complex repressing nanos mRNA translation at multiple levels. *EMBO J*.  
692 2011;30(1):90-103. DOI: 10.1038/emboj.2010.283.

- 693 67. Forrest KM, Clark IE, Jain RA, Gavis ER. Temporal complexity within a  
694 translational control element in the nanos mRNA. *Development*. 2004;131(23):5849-57.  
695 DOI: 10.1242/dev.01460.
- 696 68. Peng Y, Gavis ER. The *Drosophila* hnRNP F/H homolog Glorund recruits dFMRP  
697 to inhibit nanos translation elongation. *Nucleic Acids Res*. 2022;50(12):7067-83. DOI:  
698 10.1093/nar/gkac500.
- 699 69. Andrews S, Snowflack DR, Clark IE, Gavis ER. Multiple mechanisms collaborate  
700 to repress nanos translation in the *Drosophila* ovary and embryo. *RNA*. 2011;17(5):967-  
701 77. DOI: 10.1261/rna.2478611.
- 702 70. Liu JL, Gall JG. U bodies are cytoplasmic structures that contain uridine-rich  
703 small nuclear ribonucleoproteins and associate with P bodies. *Proc Natl Acad Sci U S A*.  
704 2007;104(28):11655-9. DOI: 10.1073/pnas.0704977104.
- 705 71. Cauchi RJ, Sanchez-Pulido L, Liu JL. *Drosophila* SMN complex proteins Gemin2,  
706 Gemin3, and Gemin5 are components of U bodies. *Exp Cell Res*. 2010;316(14):2354-  
707 64. DOI: 10.1016/j.yexcr.2010.05.001.
- 708 72. Lee L, Davies SE, Liu JL. The spinal muscular atrophy protein SMN affects  
709 *Drosophila* germline nuclear organization through the U body-P body pathway. *Dev Biol*.  
710 2009;332(1):142-55. DOI: 10.1016/j.ydbio.2009.05.553.
- 711 73. Zabolotskaya MV, Grima DP, Lin MD, Chou TB, Newbury SF. The 5'-3'  
712 exoribonuclease Pacman is required for normal male fertility and is dynamically  
713 localized in cytoplasmic particles in *Drosophila* testis cells. *Biochem J*. 2008;416(3):327-  
714 35. DOI: 10.1042/BJ20071720.

- 715 74. Lin MD, Jiao X, Grima D, Newbury SF, Kiledjian M, Chou TB. Drosophila  
716 processing bodies in oogenesis. *Dev Biol.* 2008;322(2):276-88. DOI:  
717 10.1016/j.ydbio.2008.07.033.
- 718 75. Jensen L, Venkei ZG, Watase GJ, Bisai B, Pletcher S, Lee CY, Yamashita YM.  
719 me31B regulates stem cell homeostasis by preventing excess dedifferentiation in the  
720 Drosophila male germline. *J Cell Sci.* 2021;134(14). DOI: 10.1242/jcs.258757.
- 721 76. Layana C, Vilardo ES, Corujo G, Hernandez G, Rivera-Pomar R. Drosophila  
722 Me31B is a Dual eIF4E-Interacting Protein. *J Mol Biol.* 2023;435(5):167949. DOI:  
723 10.1016/j.jmb.2023.167949.
- 724 77. Grzejda D, Mach J, Schweizer JA, Hummel B, Rezansoff AM, Eggenhofer F, et  
725 al. The long noncoding RNA mimi scaffolds neuronal granules to maintain nervous  
726 system maturity. *Sci Adv.* 2022;8(39):eabo5578. DOI: 10.1126/sciadv.abo5578.
- 727 78. Pushpalatha KV, Besse F. Local Translation in Axons: When Membraneless  
728 RNP Granules Meet Membrane-Bound Organelles. *Front Mol Biosci.* 2019;6:129. DOI:  
729 10.3389/fmolb.2019.00129.
- 730 79. Bauer KE, de Queiroz BR, Kiebler MA, Besse F. RNA granules in neuronal  
731 plasticity and disease. *Trends Neurosci.* 2023;46(7):525-38. DOI:  
732 10.1016/j.tins.2023.04.004.
- 733 80. Kipper K, Mansour A, Pulk A. Neuronal RNA granules are ribosome complexes  
734 stalled at the pre-translocation state. *J Mol Biol.* 2022;434(20):167801. DOI:  
735 10.1016/j.jmb.2022.167801.

- 736 81. Arkov AL. Looking at the Pretty "Phase" of Membraneless Organelles: A View  
737 From Drosophila Glia. *Front Cell Dev Biol.* 2022;10:801953. DOI:  
738 10.3389/fcell.2022.801953.
- 739 82. Hillebrand J, Barbee SA, Ramaswami M. P-body components, microRNA  
740 regulation, and synaptic plasticity. *ScientificWorldJournal.* 2007;7:178-90. DOI:  
741 10.1100/tsw.2007.206.
- 742 83. Kiebler MA, Bassell GJ. Neuronal RNA granules: movers and makers. *Neuron.*  
743 2006;51(6):685-90. DOI: 10.1016/j.neuron.2006.08.021.
- 744 84. Shiina N, Shinkura K, Tokunaga M. A novel RNA-binding protein in neuronal  
745 RNA granules: regulatory machinery for local translation. *J Neurosci.* 2005;25(17):4420-  
746 34. DOI: 10.1523/JNEUROSCI.0382-05.2005.
- 747 85. Krichevsky AM, Kosik KS. Neuronal RNA granules: a link between RNA  
748 localization and stimulation-dependent translation. *Neuron.* 2001;32(4):683-96. DOI:  
749 10.1016/s0896-6273(01)00508-6.
- 750 86. Fritzsche R, Karra D, Bennett KL, Ang FY, Heraud-Farlow JE, Tolino M, et al.  
751 Interactome of two diverse RNA granules links mRNA localization to translational  
752 repression in neurons. *Cell Rep.* 2013;5(6):1749-62. DOI: 10.1016/j.celrep.2013.11.023.
- 753 87. El Fatimy R, Davidovic L, Tremblay S, Jaglin X, Dury A, Robert C, et al. Tracking  
754 the Fragile X Mental Retardation Protein in a Highly Ordered Neuronal  
755 RiboNucleoParticles Population: A Link between Stalled Polyribosomes and RNA  
756 Granules. *PLoS Genet.* 2016;12(7):e1006192. DOI: 10.1371/journal.pgen.1006192.
- 757 88. De Graeve F, Besse F. Neuronal RNP granules: from physiological to  
758 pathological assemblies. *Biol Chem.* 2018;399(7):623-35. DOI: 10.1515/hsz-2018-0141.

- 759 89. Hillebrand J, Pan K, Kokaram A, Barbee S, Parker R, Ramaswami M. The  
760 Me31B DEAD-Box Helicase Localizes to Postsynaptic Foci and Regulates Expression  
761 of a CaMKII Reporter mRNA in Dendrites of Drosophila Olfactory Projection Neurons.  
762 *Front Neural Circuits*. 2010;4:121. DOI: 10.3389/fncir.2010.00121.
- 763 90. Goss DJ, Kleiman FE. Poly(A) binding proteins: are they all created equal? *Wiley*  
764 *Interdiscip Rev RNA*. 2013;4(2):167-79. DOI: 10.1002/wrna.1151.
- 765 91. Yokoshi M, Li Q, Yamamoto M, Okada H, Suzuki Y, Kawahara Y. Direct binding  
766 of Ataxin-2 to distinct elements in 3' UTRs promotes mRNA stability and protein  
767 expression. *Mol Cell*. 2014;55(2):186-98. DOI: 10.1016/j.molcel.2014.05.022.
- 768 92. Sudhakaran IP, Hillebrand J, Dervan A, Das S, Holohan EE, Hulsmeier J, et al.  
769 FMRP and Ataxin-2 function together in long-term olfactory habituation and neuronal  
770 translational control. *Proc Natl Acad Sci U S A*. 2014;111(1):E99-E108. DOI:  
771 10.1073/pnas.1309543111.
- 772 93. Lee J, Yoo E, Lee H, Park K, Hur JH, Lim C. LSM12 and ME31B/DDX6 Define  
773 Distinct Modes of Posttranscriptional Regulation by ATAXIN-2 Protein Complex in  
774 Drosophila Circadian Pacemaker Neurons. *Mol Cell*. 2017;66(1):129-40 e7. DOI:  
775 10.1016/j.molcel.2017.03.004.
- 776 94. Pushpalatha KV, Solyga M, Nakamura A, Besse F. RNP components condense  
777 into repressive RNP granules in the aging brain. *Nat Commun*. 2022;13(1):2782. DOI:  
778 10.1038/s41467-022-30066-4.
- 779 95. Formicola N, Heim M, Dufourt J, Lancelot AS, Nakamura A, Lagha M, Besse F.  
780 Tyramine induces dynamic RNP granule remodeling and translation activation in the  
781 Drosophila brain. *Elife*. 2021;10. DOI: 10.7554/eLife.65742.

- 782 96. Bauer KE, Bargenda N, Schieweck R, Illig C, Segura I, Harner M, Kiebler MA.  
783 RNA supply drives physiological granule assembly in neurons. *Nat Commun.*  
784 2022;13(1):2781. DOI: 10.1038/s41467-022-30067-3.
- 785 97. Shih CY, Chen YC, Lin HY, Chu CY. RNA Helicase DDX6 Regulates A-to-I  
786 Editing and Neuronal Differentiation in Human Cells. *Int J Mol Sci.* 2023;24(4). DOI:  
787 10.3390/ijms24043197.
- 788 98. Di Stefano B, Luo EC, Haggerty C, Aigner S, Charlton J, Brumbaugh J, et al. The  
789 RNA Helicase DDX6 Controls Cellular Plasticity by Modulating P-Body Homeostasis.  
790 *Cell Stem Cell.* 2019;25(5):622-38 e13. DOI: 10.1016/j.stem.2019.08.018.
- 791 99. Minshall N, Standart N. The active form of Xp54 RNA helicase in translational  
792 repression is an RNA-mediated oligomer. *Nucleic Acids Res.* 2004;32(4):1325-34. DOI:  
793 10.1093/nar/gkh303.
- 794 100. Ernoult-Lange M, Baconnais S, Harper M, Minshall N, Souquere S, Boudier T, et  
795 al. Multiple binding of repressed mRNAs by the P-body protein Rck/p54. *RNA.*  
796 2012;18(9):1702-15. DOI: 10.1261/rna.034314.112.
- 797 101. Iwakawa HO, Tomari Y. Life of RISC: Formation, action, and degradation of  
798 RNA-induced silencing complex. *Mol Cell.* 2022;82(1):30-43. DOI:  
799 10.1016/j.molcel.2021.11.026.
- 800 102. Michlewski G, Caceres JF. Post-transcriptional control of miRNA biogenesis.  
801 *RNA.* 2019;25(1):1-16. DOI: 10.1261/rna.068692.118.
- 802 103. Gebert LFR, MacRae IJ. Regulation of microRNA function in animals. *Nat Rev*  
803 *Mol Cell Biol.* 2019;20(1):21-37. DOI: 10.1038/s41580-018-0045-7.

- 804 104. van den Berg A, Mols J, Han J. RISC-target interaction: cleavage and  
805 translational suppression. *Biochim Biophys Acta*. 2008;1779(11):668-77. DOI:  
806 10.1016/j.bbagr.2008.07.005.
- 807 105. Chu CY, Rana TM. Translation repression in human cells by microRNA-induced  
808 gene silencing requires RCK/p54. *PLoS Biol*. 2006;4(7):e210. DOI:  
809 10.1371/journal.pbio.0040210.
- 810 106. Ozgur S, Stoecklin G. Role of Rck-Pat1b binding in assembly of processing-  
811 bodies. *RNA Biol*. 2013;10(4):528-39. DOI: 10.4161/rna.24086.
- 812 107. Ozgur S, Chekulaeva M, Stoecklin G. Human Pat1b connects deadenylation with  
813 mRNA decapping and controls the assembly of processing bodies. *Mol Cell Biol*.  
814 2010;30(17):4308-23. DOI: 10.1128/MCB.00429-10.
- 815 108. Beilharz TH, Humphreys DT, Clancy JL, Thermann R, Martin DI, Hentze MW,  
816 Preiss T. microRNA-mediated messenger RNA deadenylation contributes to  
817 translational repression in mammalian cells. *PLoS One*. 2009;4(8):e6783. DOI:  
818 10.1371/journal.pone.0006783.
- 819 109. Su H, Meng S, Lu Y, Trombly MI, Chen J, Lin C, et al. Mammalian hyperplastic  
820 discs homolog EDD regulates miRNA-mediated gene silencing. *Mol Cell*.  
821 2011;43(1):97-109. DOI: 10.1016/j.molcel.2011.06.013.
- 822 110. Ayache J, Benard M, Ernoult-Lange M, Minshall N, Standart N, Kress M, Weil D.  
823 P-body assembly requires DDX6 repression complexes rather than decay or Ataxin2/2L  
824 complexes. *Mol Biol Cell*. 2015;26(14):2579-95. DOI: 10.1091/mbc.E15-03-0136.

- 825 111. Rouya C, Siddiqui N, Morita M, Duchaine TF, Fabian MR, Sonenberg N. Human  
826 DDX6 effects miRNA-mediated gene silencing via direct binding to CNOT1. *RNA*.  
827 2014;20(9):1398-409. DOI: 10.1261/rna.045302.114.
- 828 112. Nicklas S, Okawa S, Hillje AL, Gonzalez-Cano L, Del Sol A, Schwamborn JC.  
829 The RNA helicase DDX6 regulates cell-fate specification in neural stem cells via  
830 miRNAs. *Nucleic Acids Res*. 2015;43(5):2638-54. DOI: 10.1093/nar/gkv138.
- 831 113. Teixeira D, Parker R. Analysis of P-body assembly in *Saccharomyces cerevisiae*.  
832 *Mol Biol Cell*. 2007;18(6):2274-87. DOI: 10.1091/mbc.e07-03-0199.
- 833 114. Sachdev R, Hondele M, Linsenmeier M, Vallotton P, Mugler CF, Arosio P, Weis  
834 K. Pat1 promotes processing body assembly by enhancing the phase separation of the  
835 DEAD-box ATPase Dhh1 and RNA. *Elife*. 2019;8. DOI: 10.7554/eLife.41415.
- 836 115. Kamenska A, Simpson C, Vindry C, Broomhead H, Benard M, Ernout-Lange M,  
837 et al. The DDX6-4E-T interaction mediates translational repression and P-body  
838 assembly. *Nucleic Acids Res*. 2016;44(13):6318-34. DOI: 10.1093/nar/gkw565.
- 839 116. Nissan T, Rajyaguru P, She M, Song H, Parker R. Decapping activators in  
840 *Saccharomyces cerevisiae* act by multiple mechanisms. *Mol Cell*. 2010;39(5):773-83.  
841 DOI: 10.1016/j.molcel.2010.08.025.
- 842 117. Coller JM, Tucker M, Sheth U, Valencia-Sanchez MA, Parker R. The DEAD box  
843 helicase, Dhh1p, functions in mRNA decapping and interacts with both the decapping  
844 and deadenylase complexes. *RNA*. 2001;7(12):1717-27. DOI:  
845 10.1017/s135583820101994x.



- 846 118. Eulalio A, Rehwinkel J, Stricker M, Huntzinger E, Yang SF, Doerks T, et al.  
847 Target-specific requirements for enhancers of decapping in miRNA-mediated gene  
848 silencing. *Genes Dev.* 2007;21(20):2558-70. DOI: 10.1101/gad.443107.
- 849 119. Nishihara T, Zekri L, Braun JE, Izaurralde E. miRISC recruits decapping factors  
850 to miRNA targets to enhance their degradation. *Nucleic Acids Res.* 2013;41(18):8692-  
851 705. DOI: 10.1093/nar/gkt619.
- 852 120. Hata H, Mitsui H, Liu H, Bai Y, Denis CL, Shimizu Y, Sakai A. Dhh1p, a putative  
853 RNA helicase, associates with the general transcription factors Pop2p and Ccr4p from  
854 *Saccharomyces cerevisiae*. *Genetics.* 1998;148(2):571-9. DOI:  
855 10.1093/genetics/148.2.571.
- 856 121. Maillet L, Collart MA. Interaction between Not1p, a component of the Ccr4-not  
857 complex, a global regulator of transcription, and Dhh1p, a putative RNA helicase. *J Biol*  
858 *Chem.* 2002;277(4):2835-42. DOI: 10.1074/jbc.M107979200.
- 859 122. Temme C, Zhang L, Kremmer E, Ihling C, Chartier A, Sinz A, et al. Subunits of  
860 the *Drosophila* CCR4-NOT complex and their roles in mRNA deadenylation. *RNA.*  
861 2010;16(7):1356-70. DOI: 10.1261/rna.2145110.
- 862 123. Nagarajan VK, Jones CI, Newbury SF, Green PJ. XRN 5'-->3' exoribonucleases:  
863 structure, mechanisms and functions. *Biochim Biophys Acta.* 2013;1829(6-7):590-603.  
864 DOI: 10.1016/j.bbagr.2013.03.005.
- 865 124. Braun JE, Truffault V, Boland A, Huntzinger E, Chang CT, Haas G, et al. A direct  
866 interaction between DCP1 and XRN1 couples mRNA decapping to 5' exonucleolytic  
867 degradation. *Nat Struct Mol Biol.* 2012;19(12):1324-31. DOI: 10.1038/nsmb.2413.

- 868 125. Mathys H, Basquin J, Ozgur S, Czarnocki-Cieciura M, Bonneau F, Aartse A, et al.  
869 Structural and biochemical insights to the role of the CCR4-NOT complex and DDX6  
870 ATPase in microRNA repression. *Mol Cell*. 2014;54(5):751-65. DOI:  
871 10.1016/j.molcel.2014.03.036.
- 872 126. Radhakrishnan A, Chen YH, Martin S, Alhusaini N, Green R, Collier J. The  
873 DEAD-Box Protein Dhh1p Couples mRNA Decay and Translation by Monitoring Codon  
874 Optimality. *Cell*. 2016;167(1):122-32 e9. DOI: 10.1016/j.cell.2016.08.053.
- 875 127. Sweet T, Kovalak C, Collier J. The DEAD-box protein Dhh1 promotes decapping  
876 by slowing ribosome movement. *PLoS Biol*. 2012;10(6):e1001342. DOI:  
877 10.1371/journal.pbio.1001342.
- 878 128. Sharif H, Ozgur S, Sharma K, Basquin C, Urlaub H, Conti E. Structural analysis  
879 of the yeast Dhh1-Pat1 complex reveals how Dhh1 engages Pat1, Edc3 and RNA in  
880 mutually exclusive interactions. *Nucleic Acids Res*. 2013;41(17):8377-90. DOI:  
881 10.1093/nar/gkt600.
- 882 129. Jonas S, Izaurralde E. The role of disordered protein regions in the assembly of  
883 decapping complexes and RNP granules. *Genes Dev*. 2013;27(24):2628-41. DOI:  
884 10.1101/gad.227843.113.
- 885
- 886

## 887 **Figure Legends**

### 888 **Figure 1. *Drosophila* oogenesis and Me31B expression in the egg chambers.**

889 Me31B-GFP expression is visualized in an ovariole expressing GFP-tagged wildtype  
890 Me31B (30). The top image is a sketch outlining the egg chambers and nurse cells  
891 while the bottom image shows Me31B-GFP observed using confocal microscopy.

892

### 893 **Figure 2. The Model of A Me31B Complex In Germline RNP.** In this model of Me31B-

894 containing RNP, the Me31B protein assumes a pivotal role as the central hub,  
895 orchestrating interactions with four groups of protein partners: RNA regulators,  
896 cytoskeleton/motor proteins, glycolytic enzymes, and core germ plasm proteins. Among  
897 these, the RNA regulators, including Me31B itself, provide post-transcriptional RNA  
898 regulations. Cytoskeleton/motor proteins facilitate the transportation of the RNP.  
899 Glycolytic enzymes contribute ATP resources to power the activities of other proteins  
900 within the assembly. Lastly, core germ plasm proteins play integral roles in the  
901 assembly of germ plasm/nuage and the formation of germ cells. The figure is adapted  
902 from DeHaan et al. (40)

903

### 904 **Figure 3. The Model of A Me31B-containing Repressor Complex on *nos* mRNA.**

905 The model involves Smaug (Smg), functioning as an RNA repressor/degrader, binding  
906 to Smaug Recognition Elements (SREs) in the 3' UTR of *nos* during embryonic  
907 Maternal to Zygotic Transition (MTZ). Smg recruits Cup, which then interacts with eIF4E,  
908 Tral, and Me31B. Multiple Me31B-Tral complexes coat *nos* RNA, hindering translation.  
909 Additionally, Me31B or eIF4E may also engage Belle (Bel) to further suppress *nos* RNA.

910 Finally, Me31B and/or Smaug recruit the CCR4-NOT deadenylation complex, leading to  
911 *nos* RNA degradation. The figure is adapted from Gotze et al. (54).

912

913 **Figure 4. A Schematic Illustration of The Mechanisms of How Me31B Affects**

914 **Target mRNAs.** In this model, Me31B shows various ways of influencing its target  
915 mRNA. Firstly, it oligomerizes and coats the mRNA, functioning as a general repressor.  
916 Secondly, it cooperates with RISC, a small RNA-equipped mRNA silencing machinery,  
917 in mRNA degradation/repression. Thirdly, Me31B collaborates with decapping factors  
918 (Decapper) to facilitate mRNA decapping. Additionally, it physically interacts with CCR4-  
919 NOT complex, which induces mRNA deadenylation. Finally, Me31B may directly  
920 interact with ribosomes, impeding mRNA translation. Notably, these interconnected  
921 mechanisms of action may operate independently or synergistically in a unified RNA  
922 regulation pathway.

923

# Figure 1

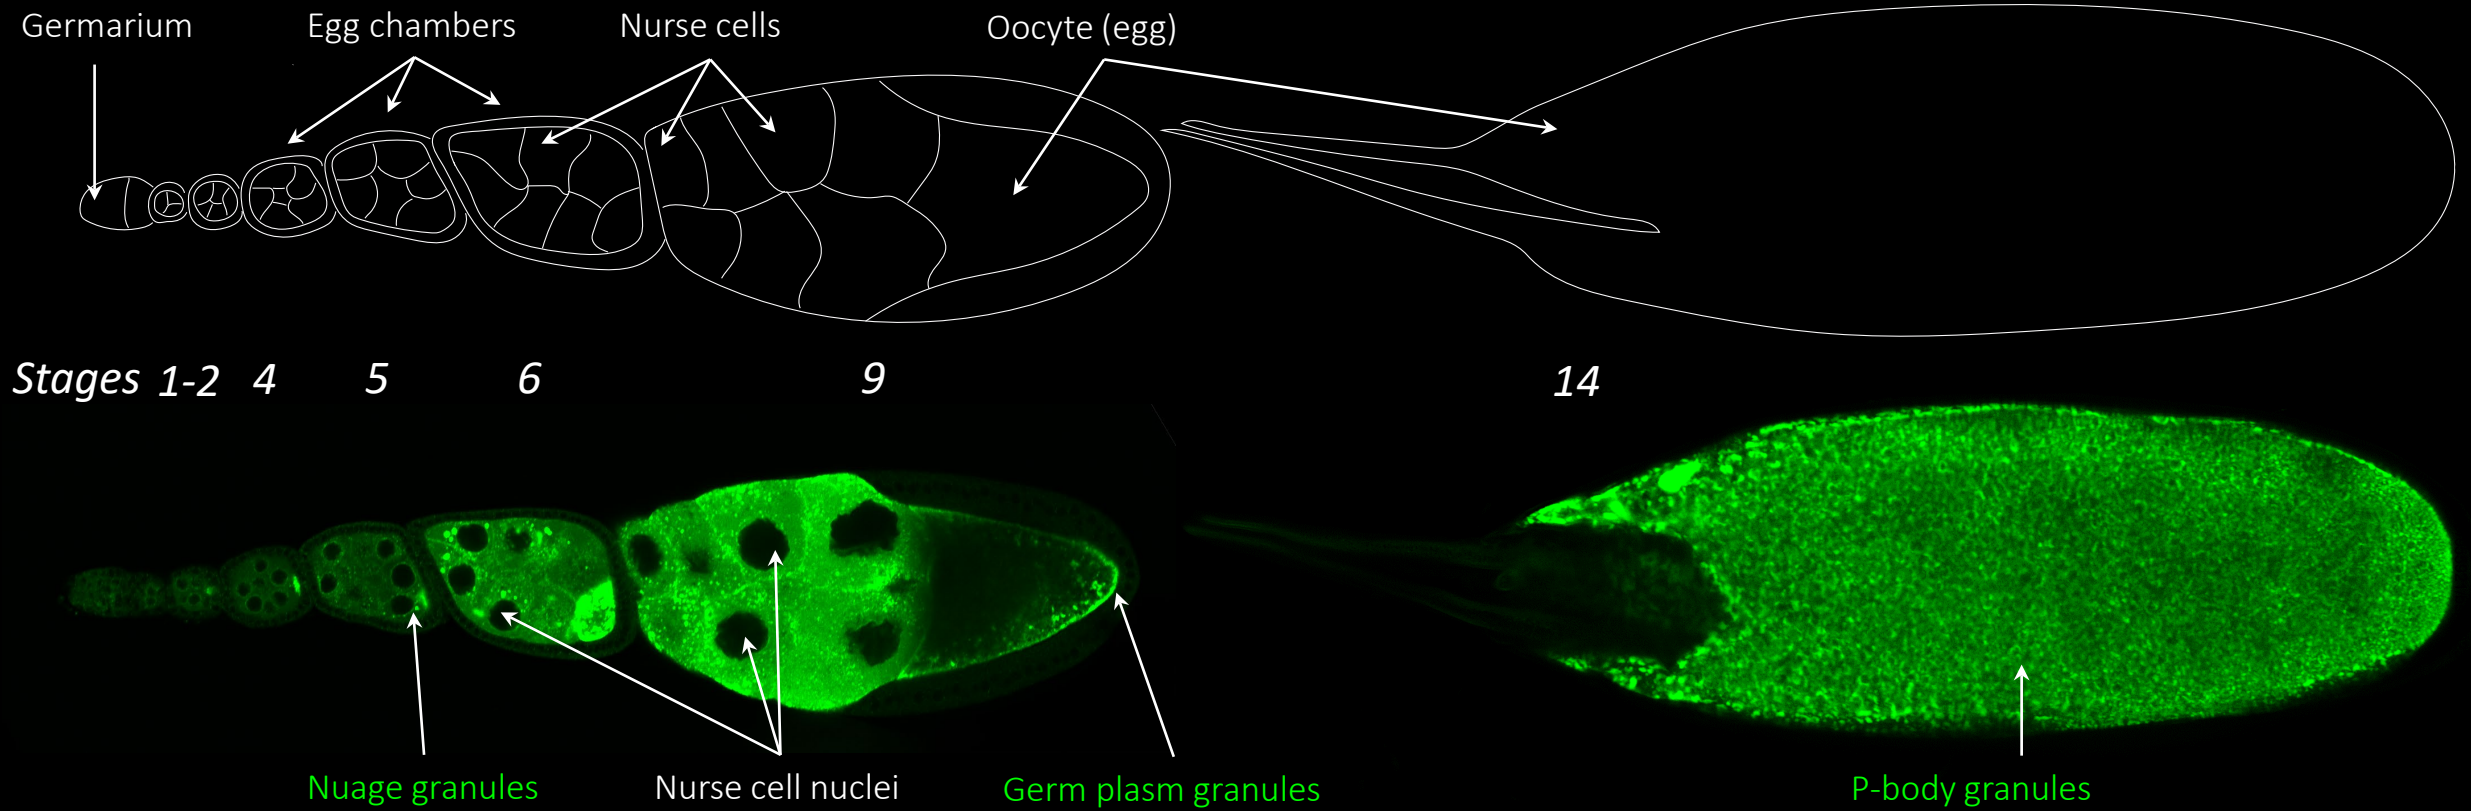

**Figure 2**

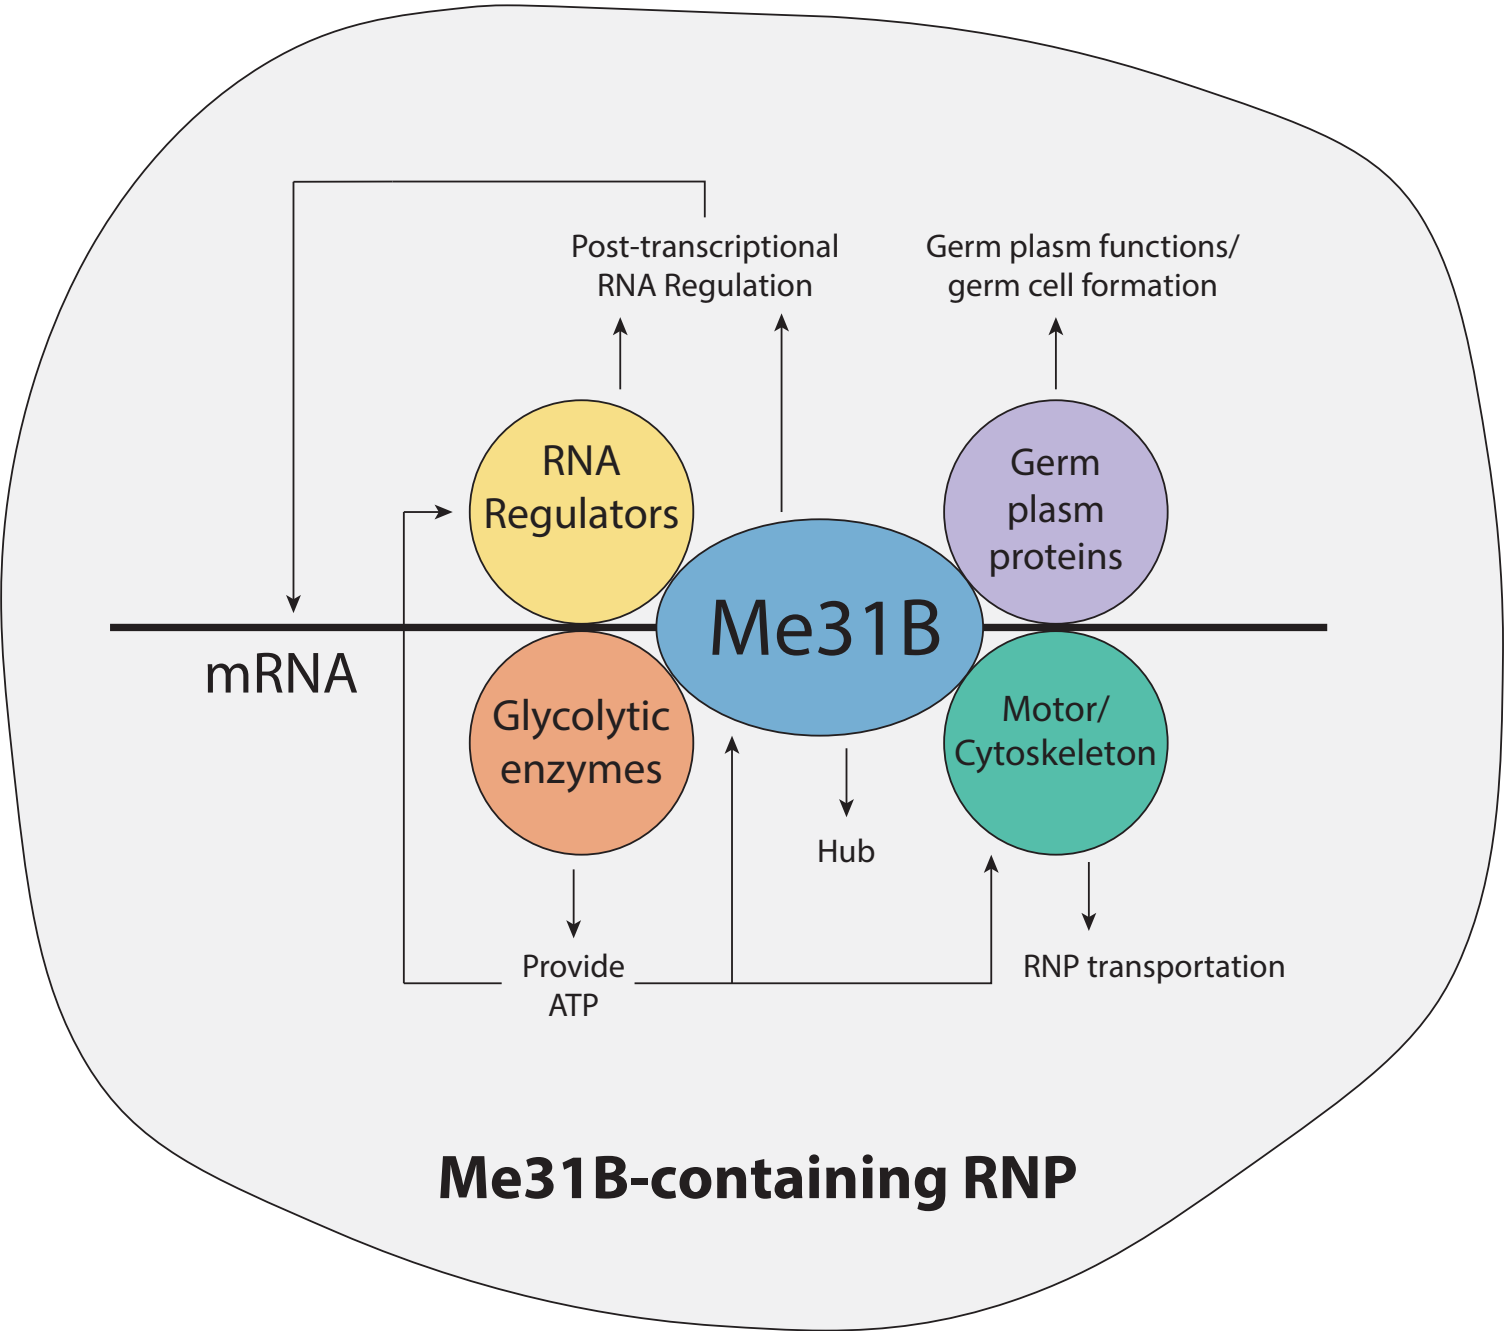

**Figure 3**

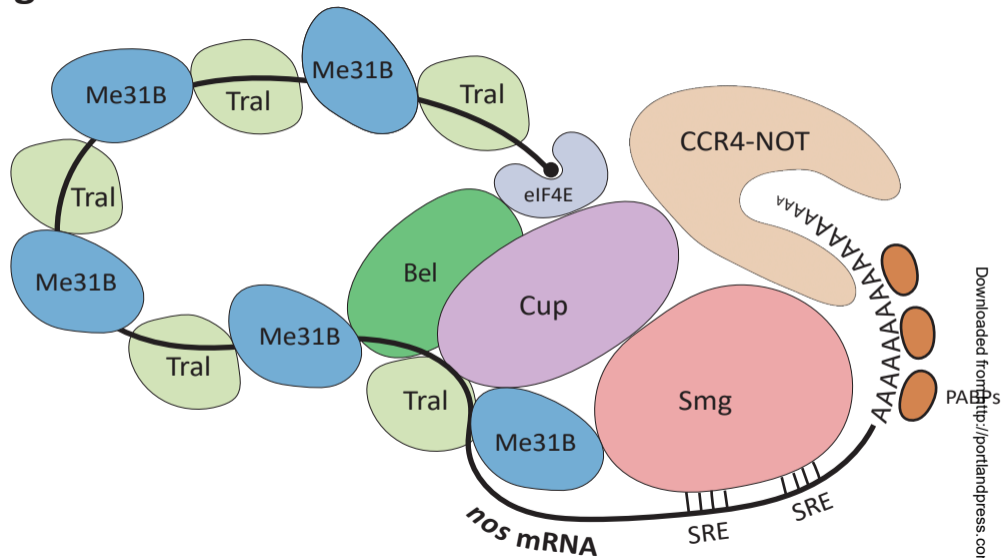

Figure 4

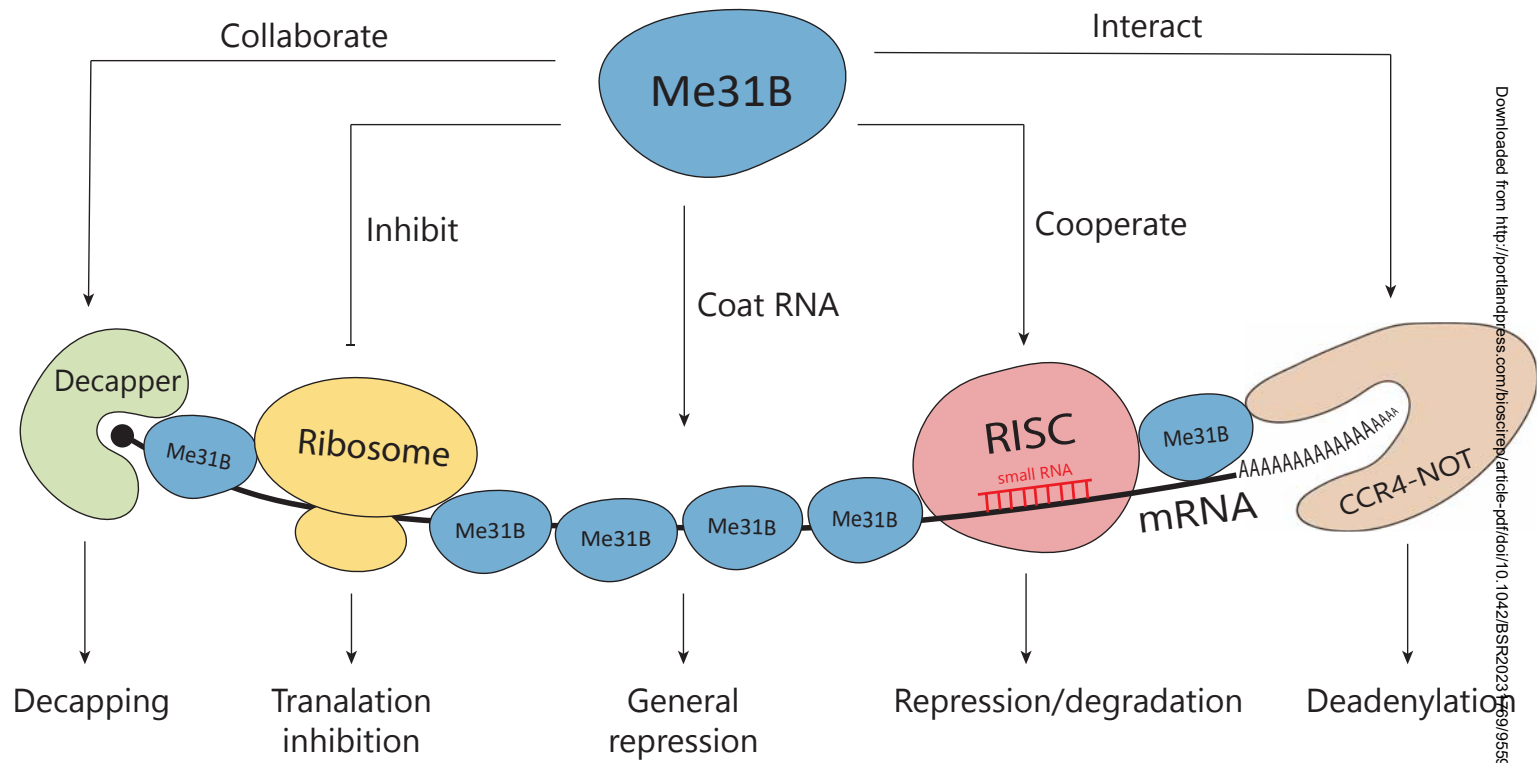

Source: https://port.silverchair.com/bioscirep/article-pdf/955921/bsr-2023-1769c.pdf
